# Supplementary material for: Age at identification, prevalence and general health of children with autism: observational study of a whole country population
Source: PubMed Central journal article supplement (PMC6629388; doi:10.1136/bmjopen-2018-025904), 2019-07-09
Supplement: bmjopen-2018-025904.draft_revisions.pdf [file bmjopen-2018-025904.draft_revisions.pdf]

# BMJ Open

BMJ Open is committed to open peer review. As part of this commitment we make the peer review history of every article we publish publicly available.

When an article is published we post the peer reviewers' comments and the authors' responses online. We also post the versions of the paper that were used during peer review. These are the versions that the peer review comments apply to.

The versions of the paper that follow are the versions that were submitted during the peer review process. They are not the versions of record or the final published versions. They should not be cited or distributed as the published version of this manuscript.

BMJ Open is an open access journal and the full, final, typeset and author-corrected version of record of the manuscript is available on our site with no access controls, subscription charges or pay-per-view fees (<http://bmjopen.bmj.com>).

If you have any questions on BMJ Open's open peer review process please email [info.bmjopen@bmj.com](mailto:info.bmjopen@bmj.com)

# BMJ Open

## Age at identification, prevalence, and general health of children with autism - observational study of a whole country population

|                               |                                                                                                                                                                                                                                                                                                                                                                                                                                                                                                                                                                                                                                                               |
|-------------------------------|---------------------------------------------------------------------------------------------------------------------------------------------------------------------------------------------------------------------------------------------------------------------------------------------------------------------------------------------------------------------------------------------------------------------------------------------------------------------------------------------------------------------------------------------------------------------------------------------------------------------------------------------------------------|
| Journal:                      | <i>BMJ Open</i>                                                                                                                                                                                                                                                                                                                                                                                                                                                                                                                                                                                                                                               |
| Manuscript ID                 | bmjopen-2018-025904                                                                                                                                                                                                                                                                                                                                                                                                                                                                                                                                                                                                                                           |
| Article Type:                 | Research                                                                                                                                                                                                                                                                                                                                                                                                                                                                                                                                                                                                                                                      |
| Date Submitted by the Author: | 07-Aug-2018                                                                                                                                                                                                                                                                                                                                                                                                                                                                                                                                                                                                                                                   |
| Complete List of Authors:     | Rydzewska, Ewelina; University of Glasgow Mental Health and Wellbeing, Institute of Health and Wellbeing<br>Hughes-McCormack, Laura; University of Glasgow Mental Health and Wellbeing, Institute of Health and Wellbeing<br>Gillberg, Christopher; The University of Glasgow, Institute of Health and Wellbeing, College of Medical, Veterinary and Life Sciences<br>Henderson, Angela; University of Glasgow Mental Health and Wellbeing, Institute of Health and Wellbeing<br>MacIntyre, Cecilia; National Records of Scotland<br>Rintoul, Julie; Scottish Government, Health & Social Care Analysis<br>Cooper, Sally-Ann; University of Glasgow, Medicine |
| Keywords:                     | autism, general health, children, young people, prevalence, PUBLIC HEALTH                                                                                                                                                                                                                                                                                                                                                                                                                                                                                                                                                                                     |
|                               |                                                                                                                                                                                                                                                                                                                                                                                                                                                                                                                                                                                                                                                               |

SCHOLARONE™  
Manuscripts

Only

1  
2  
3 **Age at identification, prevalence, and general health of children with autism -**  
4 **observational study of a whole country population**  
5

6  
7 Ewelina Rydzewska, Laura A Hughes-McCormack, Christopher Gillberg, Angela Henderson,  
8 Cecilia MacIntyre, Julie Rintoul, Sally-Ann Cooper  
9

10 Institute of Health and Wellbeing, University of Glasgow, Mental Health and Wellbeing  
11 Group, 1st Floor, Administrative Building, Gartnavel Royal Hospital, 1055 Great Western  
12 Road, Glasgow G12 0XH, UK  
13 Ewelina Rydzewska  
14 Research Associate  
15

16 Institute of Health and Wellbeing, University of Glasgow, Mental Health and Wellbeing  
17 Group, 1st Floor, Administrative Building, Gartnavel Royal Hospital, 1055 Great Western  
18 Road, Glasgow G12 0XH, UK  
19 Laura A Hughes-McCormack  
20 Research Assistant  
21

22 1 Göteborgs Universitet/University of Gothenburg, Gillbergcentrum/Gillberg Neuropsychiatry  
23 Centre, Kungsgatan 12, S-411 19 Göteborg, Sweden  
24

25 2 Institute of Health and Wellbeing, University of Glasgow, Mental Health and Wellbeing  
26 Group, 1st Floor, Administrative Building, Gartnavel Royal Hospital, 1055 Great Western  
27 Road, Glasgow G12 0XH, UK  
28 Christopher Gillberg  
29 Professor of Child and Adolescent Psychiatry  
30

31 Institute of Health and Wellbeing, University of Glasgow, Mental Health and Wellbeing  
32 Group, 1st Floor, Administrative Building, Gartnavel Royal Hospital, 1055 Great Western  
33 Road, Glasgow G12 0XH, UK  
34 Angela Henderson  
35 Scottish Learning Disabilities Observatory Deputy Director  
36

37 Census User Needs, Content and Benefits, National Records of Scotland, Ladywell House,  
38 Edinburgh EH12 7TF, UK  
39 Cecilia MacIntyre  
40 Statistician  
41

42 Health & Social Care Analysis, Scottish Government, St. Andrew's House, Regent Road,  
43 Edinburgh EH1 3DG, UK  
44 Julie Rintoul  
45 Statistician  
46

47 Institute of Health and Wellbeing, University of Glasgow, Mental Health and Wellbeing  
48 Group, 1st Floor, Administrative Building, Gartnavel Royal Hospital, 1055 Great Western  
49 Road, Glasgow G12 0XH, UK  
50 Sally-Ann Cooper  
51 Professor of Learning Disabilities  
52

53 **Corresponding author:**  
54 Professor Sally-Ann Cooper  
55 Email: [Sally-Ann.Cooper@glasgow.ac.uk](mailto:Sally-Ann.Cooper@glasgow.ac.uk)  
56  
57  
58  
59  
60

## Abstract

### Objectives:

Reported childhood prevalence of autism varies considerably between studies and over time, and general health status has been little investigated. We aimed to investigate contemporary prevalence of reported autism by age, and general health status of children/young people with and without autism.

### Design:

Secondary analysis of Scotland's Census, 2011 data. Cross-sectional study.

### Setting:

General population of Scotland.

### Participants:

All children (n=916,331) and young people (n=632,488) in Scotland.

### Main outcome measures:

Number (%) of children/young people reported to have autism; and their general health status. Prevalence of autism; prevalence of poor health (fair, bad and very bad health); odds ratios (OR: 95% confidence intervals) of autism predicting poor health, adjusted for age and gender; and OR for age and gender in predicting poor health within the population with reported autism.

### Results:

Autism was reported for 17,348/916,331 (1.9%) children aged 0-15, and 7,715/632,488 (1.2%) young people aged 16-24. The rate increased to age 11 in boys and age 10 in girls, reflecting age at diagnosis. Prevalence was 2.8% at age 10 (4.4% for boys; 1.1% for girls), and 2.9% at age 11 (4.5% for boys; 1.1% for girls). 22.0% of children and 25.5% of young people with autism reported poor health, compared with 2.0% and 4.4% without autism. Autism had OR=11.3 (11.0-11.7) in predicting poor health. Autistic females had poorer health than autistic males; OR=1.6 (1.5-1.7).

### Conclusion:

Accurate information on the proportion of autistic children and their health status is essential to accurately plan appropriate prevention and intervention measures and provide resources for those who may put demand upon services designed for autistic people.

**Keywords:** autism, general health, children, young people, prevalence.

**Strengths and limitations of this study:**

- Large, whole country population study
- High response rate of 94%, and systematic enquiry of everyone regarding autism and their general health status
- Results are generalisable to other child and young people populations in high-income countries
- Autism and general health status were self/proxy reported by respondents rather than each person having a clinical assessment
- 6% of records were imputed

## Introduction

Reports on the prevalence of autism inevitably depend upon the criteria used. The concept of autism spectrum disorders has now broadened considerably beyond original descriptions.<sup>1,2</sup> and clinicians also now base their diagnosis on fewer symptoms than a decade ago.<sup>3</sup> Additionally, there is now increased awareness about autism. Hence the reported prevalence of autism has increased. Several systematic reviews have attempted to synthesise research studies on prevalence, with overall prevalence varying, dependent upon the studies included, e.g. their age-ranges, years the studies were conducted in (and hence criteria), data-collection methods, size, and representativeness of included studies. Even when restricted to studies published since 2000, studies selected for inclusion in the reviews have shown wide ranges in reported prevalence.<sup>4-7</sup> Recent reviews are summarised in Table 1.

- Insert Table 1 here -

The included age-range in studies is likely to be critical in these reported rates, related to the age at which children are diagnosed. This, however, seems to be little investigated. A California, USA study demonstrated that as well as rates of diagnosis of autism increasing, this was particularly so amongst preschool children,<sup>8</sup> whilst a large Swedish study found that the number of autism symptoms in children diagnosed with autism had fallen in children diagnosed at age 7-12 years, but not at age 1-6 years.<sup>3</sup> In the National Survey of Children's Health, USA, 259 (24.6%) of children with autism were diagnosed at younger than 3 years of age, 479 (44.5%) at 3-5 years, and 383 (30.9%) at over 5 years of age.<sup>9</sup> A review has suggested there remains considerable variation in age at diagnosis.<sup>10</sup> Further current data is clearly needed.

One reason why it is important to understand prevalence of autism, is that the health profile of children and young people with autism is thought to differ from that of typically developing children and requires interventions and supports. Hence these combined factors; knowledge of prevalence and health profile of autistic children, are

1  
2  
3 essential for planning and delivery of services. However, in terms of general health  
4 status of children and young people with autism, there has been very little research.  
5 A study in USA reported parent-rated general health for 895 young people with  
6 autism aged 13-25 years at baseline, at five time points across 2001-2009, but did  
7 not include a general population comparison group. General health was rated as  
8 excellent, very good, good, or fair/poor.<sup>11</sup> Fair/poor ratings were reported for 6.6% in  
9 2001, 6.4% in 2003, 7.6% in 2005, 6.1% in 2007, and 6.6% in 2009.<sup>11</sup>  
10  
11  
12  
13  
14  
15

16 To our knowledge, no other studies have investigated reported general health status  
17 of children and young people with autism, nor drawn direct comparisons with the  
18 general population. This appears to be a major gap in our knowledge.  
19  
20  
21

22 This study aimed to investigate, on a large scale (the entire population of a country;  
23 Scotland) (1) the prevalence of autism, and age of reporting/identifying autism in  
24 childhood, and (2) the general health status of children and young people with  
25 autism compared with those without autism.  
26  
27  
28  
29

## 30 **Methods**

### 31 **Procedures**

32 Approval was gained from the Scottish Government for secondary analysis of  
33 Scotland's Census, 2011 data under the auspices of a collaborative research project  
34 with National Records of Scotland.  
35  
36  
37  
38  
39  
40

### 41 **Data source**

42 Scotland's Census, 2011 provides information on the number and characteristics of  
43 Scotland's population and households on the census day, 27 March 2011. The  
44 census is undertaken every 10 years. It includes the whole Scottish population:  
45 people living in communal establishments (such as care homes and student halls of  
46 residence) as well as people living in private households. Scotland's Census is one  
47 of the few country censuses, and indeed it may be unique, in identifying people with  
48 autism. One householder on behalf of all occupants in private households, and  
49 manager on behalf of all occupants in communal dwellings, was required to  
50  
51  
52  
53  
54  
55  
56

1  
2  
3 complete the Census information. The Census form clearly stated it is a legal  
4 requirement to complete the Census, and that not completing it, or supplying false  
5 information, can result in a £1,000 fine. The Census team conducted follow up of  
6 non-responders, and provided help to respond when that was needed, hence the  
7 high completion rate of 94%.<sup>12</sup>  
8  
9

10  
11 The Census team used a Census Coverage Survey, including around 40,000  
12 households, to estimate numbers and characteristics of the missing 6%. The  
13 Coverage Survey and Census records were deterministically matched using  
14 automated and clerical matching to check for duplicates. Individuals estimated to  
15 have been missed from the Census were then imputed using a subset of  
16 characteristics from real individuals, including information on their health. The edit  
17 and imputation methodology was adapted from the Office for National Statistics  
18 rigorous and systematic guidelines, which are available here:  
19  
20  
21  
22  
23

24  
25 <http://webarchive.nationalarchives.gov.uk/20160108193745/http://www.ons.gov.uk/ons/guide-method/method-quality/survey-methodology-bulletin/smb-69/index.html>  
26  
27  
28

29 Further details are available here:

30  
31  
32 <http://www.scotlandscensus.gov.uk/documents/censusresults/release1b/rel1bmethodology.pdf>  
33  
34  
35

36 Full details of the methodology and other background information on Scotland's  
37 Census 2011 are available at:

38  
39 <http://www.scotlandscensus.gov.uk/supporting-information>.  
40  
41

### 42 **Census variables**

43  
44 People with autism were identified from Census question 20, which asked: 'Do you  
45 have any of the following conditions which have lasted, or are expected to last, at  
46 least 12 months? Tick all that apply'. There was a choice of 10 response options,  
47 which included: Developmental disorder (for example, Autistic Spectrum Disorder or  
48 Asperger's Syndrome), Learning disability (for example, Down's Syndrome),  
49 Learning difficulty (for example, dyslexia), and Mental health condition.  
50  
51  
52  
53  
54  
55  
56  
57  
58  
59  
60



1  
2  
3 During the methodology development for Scotland's Census, 2011, Ipsos MORI  
4 Scotland was commissioned to undertake cognitive question testing on question 20  
5 on long-term health conditions and disabilities. This was to test whether the  
6 questions were answered accurately and willingly by respondents, and to identify  
7 any changes needed to improve data quality and/or the acceptability of the response  
8 options. Cognitive interviewing is a widely used approach to critically evaluate and  
9 improve survey questionnaires.<sup>13</sup> It enables researchers to modify survey material to  
10 enhance clarity. Retrospective probing was selected as the most appropriate  
11 technique. The questions were tested with 102 participants with a mix of gender, age  
12 and health conditions and disabilities (including people with more than one of the  
13 conditions), to ensure accurate and willing completion. They included people with  
14 autism, intellectual disabilities, dyslexia, dyspraxia, speech impairment, mental  
15 health conditions (both milder and more serious), and other long-term conditions.  
16 This resulted in a redesign of the question on autism, to 'Developmental disorder,  
17 (for example Autism Spectrum Disorder or Asperger's Syndrome)' in order to  
18 accurately capture specifically the data on autism. The questions on the other  
19 conditions tested (some of which, from a medical perspective, can be considered as  
20 developmental disorders) did not require any modification. Further information can  
21 be found at:  
22  
23  
24  
25  
26  
27  
28  
29  
30  
31  
32

33  
34 [http://www.scotlandscensus.gov.uk/documents/research/2011-census-health-](http://www.scotlandscensus.gov.uk/documents/research/2011-census-health-disability-questions.pdf)  
35 [disability-questions.pdf](http://www.scotlandscensus.gov.uk/documents/research/2011-census-health-disability-questions.pdf)  
36

37  
38 [http://www.scotlandscensus.gov.uk/documents/legislation/changes-to-gov-](http://www.scotlandscensus.gov.uk/documents/legislation/changes-to-gov-statement-report.pdf)  
39 [statement-report.pdf](http://www.scotlandscensus.gov.uk/documents/legislation/changes-to-gov-statement-report.pdf)  
40

41  
42 Hence the choice of wording of the question on autism was informed and carefully  
43 considered. The term developmental disorder was used and only prompted  
44 respondents to reply with regards to autistic spectrum disorder or Asperger  
45 syndrome, and the question distinguished autism from learning disability (which in  
46 the UK is synonymous with the international term 'intellectual disabilities'), learning  
47 difficulties such as dyslexia, and mental health conditions.  
48  
49  
50  
51  
52  
53  
54  
55  
56  
57  
58  
59  
60

1  
2  
3 The Census team imputed answers for the 14.7% who did not tick any of the boxes  
4 in question 20, based on their free text answers for this question and answers to  
5 other health questions in the Census, which increased the completion rate to 97.4%.  
6 For the remaining 2.6%, the Census team assumed the most plausible explanation  
7 was that the person had no long-term condition but did not see the 'No  
8 condition' check box at the end of the question, and hence recorded them as such.  
9  
10  
11  
12

13  
14 Information on general health status was collected through question 19 which had a  
15 five-point response scale: 'How is your health in general?' (1) very good, (2) good,  
16 (3) fair, (4) bad, (5) very bad. Similarly, as for question 20, question 19 was tested  
17 during the cognitive question testing during the development of the Census. The  
18 question was found to not require any modification.  
19  
20  
21  
22

### 23 24 **Data analysis**

25 We calculated the number and percentage of children reported to have autism, by  
26 age and gender. We also calculated the number and percentage of children and  
27 young people with and without autism reporting very good, good, fair, bad, and very  
28 bad health, and compared differences using chi-square tests. Within the whole  
29 population of children and young people in Scotland, we then used a logistic  
30 regression to calculate odds ratios (OR; with 95% confidence intervals) of autism  
31 predicting a derived, dichotomised variable of poor health (fair, bad, or very bad  
32 health) versus good health (very good or good health), adjusted for age and gender.  
33 Age was categorised into groups of 0-15 years (children), or 16-24 years (youth),  
34 with the 0-15-year olds being the reference group. The age groups were selected as  
35 in Scotland full legal capacity, with some limitations, is granted to people aged 16  
36 and over. Gender was binary; the reference group was male. We then calculated the  
37 ORs of age and gender in predicting poor health within the population with autism.  
38 All analyses were conducted with SPSS software version 22.  
39  
40  
41  
42  
43  
44  
45  
46  
47  
48  
49

### 50 **Patient and Public Involvement**

51 The question on autism was included in Scotland's Census, 2011 at the behest of  
52 third sector organisations for people with autism. People with autism took part in the  
53 cognitive question testing during the planning of the Census. This study was  
54  
55  
56  
57  
58  
59  
60

undertaken by the Scottish Learning Disabilities Observatory, which has a specific remit for people with autism; its steering group includes partners from third sector organisations. Results from this study will be disseminated for people with autism in easy-read version via the Scottish Learning Disabilities Observatory website and newsletters.

## Results

### Number (%) of children and young people with autism by age and gender

Scotland's Census, 2011 includes records on 916,331 children aged 0-15 years and 632,488 young people aged 16-24 years. Autism was reported for 17,348 (1.9%) of the children, and 7,715 (1.2%) of the young people. Table 2 and Figure 1 show the age and gender distribution of the children with and without autism. As expected, there are more males than females with autism; 13,841/17,348 (79.8%) of children with autism were male. The rate of reported autism increased to age 11 in boys and age 10 in girls, being relatively similar across ages 9-15 years for both genders, reflecting the ages at which the autism was diagnosed in the population. Prevalence was 2.8% at age 10 years (4.4% for boys and 1.1% for girls), and 2.9% at age 11 years (4.5% for boys and 1.1% for girls).

- Insert Table 2 here -

- Insert Figure 1 here -

### General health

Table 3 shows reported general health status of children and young people with and without autism in Scotland. The children and young people with autism reported poorer health; 22.0% of children and 25.5% of young people with autism reported poor (fair, bad, or very bad) general health, compared with only 2.0% of children and 4.4% of young people without autism ( $\chi^2=29365.6$ ;  $df=1$ ;  $p<0.001$  for children, and  $\chi^2=7652.1$ ;  $df=1$ ;  $p<0.001$  for young people). Table 3 shows that the discrepancy between those with and without autism was greater for females than males, for children rather than young people, and was even more prominent when comparing

1  
2  
3 bad/very bad health (as opposed to fair/bad/very bad health), e.g. 9.1% of girls with  
4 autism had bad/very bad health compared with only 0.4% of girls without autism.  
5  
6

7  
8 - Insert Table 3 here -  
9

10  
11 Table 4 shows the results from the regression with the whole population data. Autism  
12 had OR=11.3 (11.0-11.7, 95% CI) in predicting poor health, adjusted for gender and  
13 age. Young people were more likely to have poor health than children, as were  
14 females. This pattern was also seen within the autistic population, more markedly so  
15 for females, and less so for increasing age when compared with the whole  
16 population (Table 5). Female gender had OR=1.6 (1.5-1.7, 95% CI), and age 16-24  
17 years had OR=1.2 (1.1-1.3, 95% CI) in predicting poor health within the autistic  
18 population.  
19  
20  
21  
22  
23

24  
25 - Insert Table 4 here –  
26

27  
28 - Insert Table 5 here -  
29  
30

## 31 **Discussion**

### 32 **Principle findings and interpretation**

33  
34  
35 We identified the prevalence of reported autism to be 1.9% in children aged 0-15  
36 years overall, and that the reported rate increased with age up to age 10 years in  
37 girls and 11 years in boys, reflecting the age at which it was identified/diagnosed.  
38 Almost all were identified by age 9 years, with the majority before primary school.  
39 Prevalence was 2.8% at age 10 years, and 2.9% at age 11 years; higher than when  
40 the rate is reported for all children overall. This is of importance when interpreting  
41 prevalence studies, as autism in early childhood will clearly be under-reported so  
42 lowering the overall reported childhood prevalence, unless detailed individual  
43 assessments are undertaken which is not realistic in large scale population-based  
44 research. Our study is the only whole-country population study we are aware of to-  
45 date to report prevalence of autism using current concepts of the autism spectrum  
46 and is highly representative as autism was systematically enquired about for the  
47  
48  
49  
50  
51  
52  
53  
54  
55

56 10  
57  
58  
59  
60

entire population, with a 94% response rate. Of considerable significance, we are first to report that children/young people with autism were more than 11 times more likely to have poor health than the rest of the population. This inequality was greater for females than males, and more so than in the general population.

### **Comparison with existing literature**

We found a higher rate of autism than that in the most recent systematic reviews on the subject. This finding most likely reflects that the data is more recent (2011) compared to the most recent reviews, which included data from studies completed a decade earlier, and that we report by year of age, rather than just for all children combined. More comparable studies include the Stockholm Youth Cohort which reported rates of autism in 2011 of 0.40% at age 0-5 years, 1.74% at age 6-12 years, 2.46% at age 13-17 years, and 1.76% at age 18-27 years; and of 1.44% at ages 0-17 years overall.<sup>14</sup> The Data Resource Center for Child & Adolescent Health findings for 2014<sup>15</sup> and 2016<sup>9</sup> report higher prevalence of autism at 2.2% (n=243) and 2.5% (n=1,131) in all 3-17-year olds but is on a smaller scale. The Autism and Developmental Disabilities Monitoring Network, in 11 sites in the USA, provides estimates of the prevalence of autism in 8-year-old children.<sup>16</sup> In 2014 this varied across sites from 1.3% to 2.9%, with a combined prevalence of 1.7%.<sup>16</sup>

Reported general health was substantially poorer for children and young people with autism compared with the general population. However, there is limited previous research with which to compare our findings; indeed, we believe we are the first to study general health status compared directly with the general population in a large, representative population of children and young people with autism. Our findings of poor (fair, bad, or very bad) health in 2.0% of children and 4.4% of young people without autism are similar to those reported in a National Health Interview Survey in 2014 which found fair/poor health for 1.6% (n=234) of children aged 0-17 years.<sup>15</sup> However, it did not report health status separately for children with autism. A further USA study reported lower rates of fair/poor health than the 25.5% we found in the young people with autism.<sup>11</sup> It reported fair/poor health in 6.6% in 2001, 6.4% in 2003, 7.6% in 2005, 6.1% in 2007, and 6.6% in 2009 of 895 young people with autism aged 13-25 years at baseline, but did not have a general population comparison group.<sup>11</sup> However, it used measures of health not directly comparable

1  
2  
3 with our study, using a four-point scale of excellent, very good, good, and fair/poor  
4 health.<sup>11</sup>  
5  
6

7  
8 Young people with autism had poorer health than children with autism, but the extent  
9 of this difference was much less than that seen in the general population. The  
10 difference in the extent of influence of age category between the people with and  
11 without autism lies in the substantial inequalities in general health that are  
12 associated with having autism, regardless of age.  
13  
14  
15

### 16 17 **Strengths and limitations**

18  
19 This large-scale study covers the whole population of Scotland and we believe it is  
20 currently unique in being a whole country study in which every citizen was  
21 systematically enquired about regarding having autism and their general health  
22 status. It also had a high completion rate at 94%, suggesting the results are highly  
23 representative and likely to be generalisable to other high-income countries. The  
24 wording of the question on autism was informed in advance by the cognitive question  
25 testing procedure. It included the terms autistic spectrum disorder and Asperger's  
26 syndrome, and was distinguished from intellectual disabilities, specific learning  
27 disability, and mental health conditions. Hence, we consider that respondents will  
28 have replied accordingly, i.e. responded regarding autism. However, we have no  
29 means to check this. Respondents reported whether or not each child/young person  
30 was known to have autism rather than each person having an assessment for  
31 autism, so some reporting error is possible. The majority of reports were proxy-  
32 reports by parents, but we do not know the extent of proxy versus self-reports for the  
33 young people. Neither do we know the extent to which proxy-reporting of general  
34 health status compares with an individual's report, and the general health status  
35 responses were subjective rather than objective measurements. Whilst we described  
36 the imputation process, we cannot state with certainty whether the imputed 6% of  
37 records contained the same, more or fewer proportion of children and young people  
38 with reported autism but note that this missing 6% is a small proportion overall.  
39 Imputation of zero by the Census team on the 2.6% with missing data on long-term  
40 conditions was not tested, though considered to be the most plausible explanation.  
41  
42 Despite these limitations, we believe the results of this study are generalisable to  
43  
44  
45  
46  
47  
48  
49  
50  
51  
52  
53  
54  
55

1  
2  
3 other high-income countries and fill a significant gap in existing research on general  
4 health status of children and young people with autism.  
5

### 6 7 **Implications for clinicians**

8 It is essential to have accurate information on the proportion of children and young  
9 people who are known to have autism, and their health status, in order to accurately  
10 plan appropriate prevention and intervention measures, and provision of resources  
11 for those people who may put demand upon services designed for people with  
12 autism. This requires a full understanding of age differences, and age at diagnosis.  
13 The poor general health status observed in the population of children and young  
14 people with autism demonstrates a clear need to focus on improvements in  
15 healthcare and supports, and the wider determinants of health in this group, which  
16 may well differ from the general population.  
17  
18  
19  
20  
21  
22  
23  
24  
25  
26  
27  
28  
29  
30  
31  
32  
33  
34  
35  
36  
37  
38  
39  
40  
41  
42  
43  
44  
45  
46  
47  
48  
49  
50  
51  
52  
53  
54  
55  
56  
57  
58  
59  
60

**Word count: 3,024**

**Acknowledgements:**

We thank the National Records of Scotland for assisting with the data analysis and dissemination stages of the project.

**Contributors:**

ER analysed the data, jointly interpreted it, and wrote the first draft of the manuscript, LAH-M, CG, and AH jointly interpreted the data, and contributed to the manuscript, CM and JR worked on the Census, jointly interpreted the data, and contributed to the manuscript, S-AC conceived the project, interpreted the data, and contributed to the manuscript. All authors approved the final version of the manuscript. S-AC is the study guarantor.

S-AC confirms the manuscript is an honest, accurate and transparent account of the study being reported, that no important aspects of the study have been omitted, and there has been no discrepancies from the study as planned.

**Funding:**

This study was funded by the Medical Research Council (grant reference MC\_PC\_17217) and the Scottish Government via the xxx. The funders had no role in the study design, collection, analyses and interpretation of data, in writing the report, nor in the decision to submit the article for publication.

**Competing interests:**

All authors have completed the Unified Competing Interest form (available on request from the corresponding author) at [www.icmje.org/coi\\_disclosure.pdf](http://www.icmje.org/coi_disclosure.pdf) and declare: all authors had financial support from the Scottish Government for the submitted work; no financial relationships with any organisations that might have an interest in the submitted work in the previous three years; no other relationships or activities that could appear to have influenced the submitted work.

**Patient consent:**

Not applicable

**Ethical approval:**

Permission to access data was granted by the Scottish Government.

**Provenance and peer review:**



1  
2  
3  
4  
5  
6  
7  
8  
9  
10  
11  
12  
13  
14  
15  
16  
17  
18  
19  
20  
21  
22  
23  
24  
25  
26  
27  
28  
29  
30  
31  
32  
33  
34  
35  
36  
37  
38  
39  
40  
41  
42  
43  
44  
45  
46  
47  
48  
49  
50  
51  
52  
53  
54  
55  
56  
57  
58  
59  
60

Not commissioned; externally peer reviewed.

**Data sharing statement:**

Data available at:

<http://www.scotlandscensus.gov.uk/ods-web/data-warehouse.html#additionaltab>

For peer review only

## References

1. Kanner L. Autistic disturbances of affective contact. *Nervous Child* 1943;2:217-250.
2. Asperger H. Die 'autistischen psychopathen' im kindersalter (autistic psychopathology of childhood). *Archiv für Psychiatrie und Nervenkrankheiten* 1944;177:76-136.
3. Arvidsson O, Gillberg C, Lichtenstein P, et al. Secular changes in the symptom level of clinically diagnosed autism. *J Child Psychol Psychiatry* 2018; doi:10.1111/jcpp.12864
4. French LR, Bertone A, Hyde KL, et al. Epidemiology of Autism Spectrum Disorders. In: Buxbaum J, Hof PR, eds. *The Neuroscience of Autism Spectrum Disorders*. New York: Academic Press 2013.
5. Elsabbagh M, Divan G, Koh YJ, et al. Global Prevalence of Autism and Other Pervasive Developmental Disorders. *Autism Res* 2012;5:160-179.
6. Tsai LY. Impact of DSM-5 on epidemiology of Autism Spectrum Disorder. *Res Autism Spectr Disord* 2014;8(11):1454-1470.
7. Adak R and Halder S. Systematic review on prevalence for autism spectrum disorder with respect to gender and socio-economic status. *J Ment Disord Treat* 2017;3(1):1-9.
8. Hertz-Picciotto I and Delwiche L. The Rise in Autism and the Role of Age at Diagnosis. *Epidemiol* 2009;20(1):84-90.
9. Data Resource Center for Child & Adolescent Health. *National Survey of Children's Health; 2016*. Available at: <http://childhealthdata.org/browse/survey>
10. Daniels AM and Mandell DS. Explaining differences in age at autism spectrum disorder diagnosis: A critical review. *Autism* 2014;18(5):583-597.
11. National Longitudinal Transition Study 2 (NLTS2). *Data Tables NLTS2 Waves 1 – 5; 2017*. Available at: [http://www.nlts2.org/data\\_tables/index.html](http://www.nlts2.org/data_tables/index.html)
12. National Records of Scotland (NRS). *2011 Census Release 1C - How the 2011 Census population estimates were obtained*. Edinburgh: National Records of Scotland 2013.
13. Wills GB. *Cognitive Interviewing. A tool for improving questionnaire design*. Thousand Oaks: Sage Publications 2005.
14. Idring S, Lundberg M, Sturn H, et al. Changes in prevalence of autism spectrum disorders in 2001–2011: Findings from the Stockholm Youth Cohort. *J Autism Dev Disord* 2015;45: 1766–1773.
15. Data Resource Center for Child & Adolescent Health. *National Health Interview Survey (NHIS) – Child; 2014*. Available at: <http://childhealthdata.org/browse/survey>
16. Centres for Disease Control and Prevention. Prevalence of Autism Spectrum Disorder Among Children Aged 8 Years - Autism and Developmental Disabilities Monitoring Network, 11 Sites, United States, 2014. *Surveill Summ* 2018;67(6):1-23.

**Table 1. Examples of findings from systematic reviews of recent studies on childhood/youth prevalence of autism**

| Review                                  |                                    | N of studies | Publication dates of studies | Median prevalence /1,000 | Range /1,000 |
|-----------------------------------------|------------------------------------|--------------|------------------------------|--------------------------|--------------|
| <b>Autistic disorder</b>                |                                    |              |                              |                          |              |
| French et al., 2013                     | Autistic disorder                  | 26           | 2000-2011                    | 2.2                      | 0.8-9.4      |
|                                         | Asperger syndrome*                 | 13           | 1998-2011                    | 2.1                      | 0.5-2.8      |
| Elsabbagh et al., 2012                  | Northern European                  | 16           | 2000-2008                    | 1.9                      | 0.7-3.9      |
|                                         | Western Pacific                    | 12           | 2000-2011                    | 1.2                      | 0.3-9.4      |
|                                         | South East Asia/East Mediterranean | 0            | -                            | -                        | -            |
|                                         | Americas                           | 7            | 2001-2010                    | 2.2                      | 1.1-4.1      |
|                                         | <i>Overall</i>                     |              |                              | 1.7                      | 0.3-9.4      |
| Tsai, 2014                              |                                    | 43           | 2001-2013                    | 2.8                      | 0.3-19.0     |
| <b>Pervasive developmental disorder</b> |                                    |              |                              |                          |              |
| French et al., 2013                     |                                    | 34           | 2000-2011                    | 6.2                      | 0.6-26.4     |
| Elsabbagh et al., 2012                  | Northern Europe                    | 14           | 2000-2011                    | 6.2                      | 3.0-11.6     |
|                                         | Western Pacific                    | 4            | 2004-2011                    | -                        | 1.6-19.0     |
|                                         | South East Asia/East Mediterranean | 4            | 2007-2012                    | -                        | 0.1-10.7     |
|                                         | Americas                           | 13           | 2001-2010                    | 6.6                      | 1.3-11.0     |
|                                         | <i>Overall</i>                     |              |                              | 6.2                      | 0.1-19.0     |
| Tsai, 2014                              |                                    | 59           | 2000-2014                    | 7.0                      | 0.2-26.4     |
| Adak & Halder, 2017                     |                                    | 25           | 2005-2015                    | 9.2                      | 0.7-26.4     |

\*The authors comment on dubious quality of results

**Table 2. Identified prevalence of childhood autism by age and gender**

| Age in years | All children   |                |                | Children with autism |                     |                      |
|--------------|----------------|----------------|----------------|----------------------|---------------------|----------------------|
|              | Total          | Female         | Male           | Total                | Female              | Male                 |
| 0            | 58,715         | 28,823         | 29,892         | 76 (0.1%)            | 34 (0.1%)           | 42 (0.1%)            |
| 1            | 59,556         | 29,188         | 30,368         | 126 (0.2%)           | 52 (0.2%)           | 74 (0.2%)            |
| 2            | 58,909         | 28,936         | 29,973         | 301 (0.5%)           | 87 (0.3%)           | 214 (0.7%)           |
| 3            | 58,764         | 28,735         | 30,029         | 509 (0.9%)           | 132 (0.5%)          | 377 (1.3%)           |
| 4            | 56,877         | 27,915         | 28,962         | 730 (1.3%)           | 176 (0.6%)          | 554 (1.9%)           |
| 5            | 55,224         | 26,910         | 28,314         | 966 (1.7%)           | 223 (0.8%)          | 743 (2.6%)           |
| 6            | 55,236         | 26,872         | 28,364         | 1,053 (1.9%)         | 200 (0.7%)          | 853 (3.0%)           |
| 7            | 53,786         | 26,172         | 27,614         | 1,154 (2.1%)         | 244 (0.9%)          | 910 (3.3%)           |
| 8            | 52,325         | 25,665         | 26,660         | 1,243 (2.4%)         | 222 (0.9%)          | 1,021 (3.8%)         |
| 9            | 53,046         | 26,022         | 27,024         | 1,418 (2.7%)         | 257 (1.0%)          | 1,161 (4.3%)         |
| 10           | 55,067         | 26,950         | 28,117         | 1,549 (2.8%)         | 306 (1.1%)          | 1,243 (4.4%)         |
| 11           | 56,769         | 27,699         | 29,070         | 1,623 (2.9%)         | 313 (1.1%)          | 1,310 (4.5%)         |
| 12           | 58,656         | 28,412         | 30,244         | 1,665 (2.8%)         | 324 (1.1%)          | 1,341 (4.4%)         |
| 13           | 59,971         | 29,353         | 30,618         | 1,705 (2.8%)         | 330 (1.1%)          | 1,375 (4.5%)         |
| 14           | 61,152         | 29,586         | 31,566         | 1,658 (2.7%)         | 307 (1.0%)          | 1,351 (4.3%)         |
| 15           | 62,278         | 29,987         | 32,291         | 1,572 (2.5%)         | 300 (1.0%)          | 1,272 (3.9%)         |
| <b>0-15</b>  | <b>916,331</b> | <b>447,225</b> | <b>469,106</b> | <b>17,348 (1.9%)</b> | <b>3,507 (0.8%)</b> | <b>13,841 (3.0%)</b> |

**Table 3. General health status of children and young people with and without autism**

| General health | Age in years              |                      |                       |                            |                        |                        |                          |                      |                      |                            |                        |                        |
|----------------|---------------------------|----------------------|-----------------------|----------------------------|------------------------|------------------------|--------------------------|----------------------|----------------------|----------------------------|------------------------|------------------------|
|                | 0-15 years<br>N=916,331   |                      |                       |                            |                        |                        | 16-24 years<br>N=632,488 |                      |                      |                            |                        |                        |
|                | Autism                    |                      |                       | Without autism             |                        |                        | Autism                   |                      |                      | Without autism             |                        |                        |
|                | Total<br>17,348<br>(100%) | F<br>3,507<br>(100%) | M<br>13,841<br>(100%) | Total<br>898,983<br>(100%) | F<br>443,718<br>(100%) | M<br>455,265<br>(100%) | Total<br>7,715<br>(100%) | F<br>1,676<br>(100%) | M<br>6,039<br>(100%) | Total<br>624,773<br>(100%) | F<br>313,929<br>(100%) | M<br>310,844<br>(100%) |
| Very good      | 7,470<br>(43.1%)          | 1,291<br>(36.8%)     | 6,179<br>(44.6%)      | 758,328<br>(84.4%)         | 376,945<br>(85.0%)     | 381,383<br>(83.8%)     | 3,070<br>(39.8%)         | 531<br>(31.7%)       | 2,539<br>(42.0%)     | 459,492<br>(73.5%)         | 223,178<br>(71.1%)     | 236,314<br>(76.0%)     |
| Good           | 6,073<br>(35.0%)          | 1,178<br>(33.6%)     | 4,895<br>(35.4%)      | 122,814<br>(13.7%)         | 58,499<br>(13.2%)      | 64,315<br>(14.1%)      | 2,683<br>(34.8%)         | 605<br>(36.1%)       | 2,078<br>(34.4%)     | 137,956<br>(22.1%)         | 75,489<br>(24.0%)      | 62,467<br>(20.1%)      |
| Fair           | 2,892<br>(16.7%)          | 718<br>(20.5%)       | 2,174<br>(15.7%)      | 14,760<br>(1.6%)           | 6,800<br>(1.5%)        | 7,960<br>(1.7%)        | 1,451<br>(18.8%)         | 367<br>(21.9%)       | 1,084<br>(17.9%)     | 22,102<br>(3.5%)           | 12,507<br>(4.0%)       | 9,595<br>(3.1%)        |
| Bad            | 651<br>(3.8%)             | 204<br>(5.8%)        | 447<br>(3.2%)         | 2,367<br>(0.3%)            | 1,159<br>(0.3%)        | 1,208<br>(0.3%)        | 375<br>(4.9%)            | 125<br>(7.5%)        | 250<br>(4.1%)        | 4,237<br>(0.7%)            | 2,279<br>(0.7%)        | 1,958<br>(0.6%)        |
| Very bad       | 262<br>(1.5%)             | 116<br>(3.3%)        | 146<br>(1.1%)         | 714<br>(0.1%)              | 315<br>(0.1%)          | 399<br>(0.1%)          | 136<br>(1.8%)            | 48<br>(2.9%)         | 88<br>(1.5%)         | 986<br>(0.2%)              | 476<br>(0.2%)          | 510<br>(0.2%)          |

**Table 4. Odds ratio of autism, age, and gender in predicting poor health\* in the whole population**

| Variable |                       | Odds ratio | 95% confidence interval |
|----------|-----------------------|------------|-------------------------|
| Autism   | No autism (reference) | -          |                         |
|          | Autism                | 11.339     | 10.983-11.707           |
| Age      | 0-15 (reference)      | -          |                         |
|          | 16-24                 | 2.137      | 2.098-2.176             |
| Gender   | Male (reference)      | -          |                         |
|          | Female                | 1.126      | 1.106-1.147             |
| Constant |                       | .020       |                         |

\*fair, bad or very bad health

**Table 5. Odds ratios of age and gender in predicting poor health\* in the population with autism**

| Variable |                  | Odds ratio | 95% confidence interval |
|----------|------------------|------------|-------------------------|
| Age      | 0-15 (reference) | -          |                         |
|          | 16-24            | 1.206      | 1.133-1.284             |
| Gender   | Male (reference) | -          |                         |
|          | Female           | 1.635      | 1.527-1.750             |
| Constant |                  | .252       |                         |

\*fair, bad or very bad health

**Figure 1. Identified childhood prevalence of autism by age and gender**

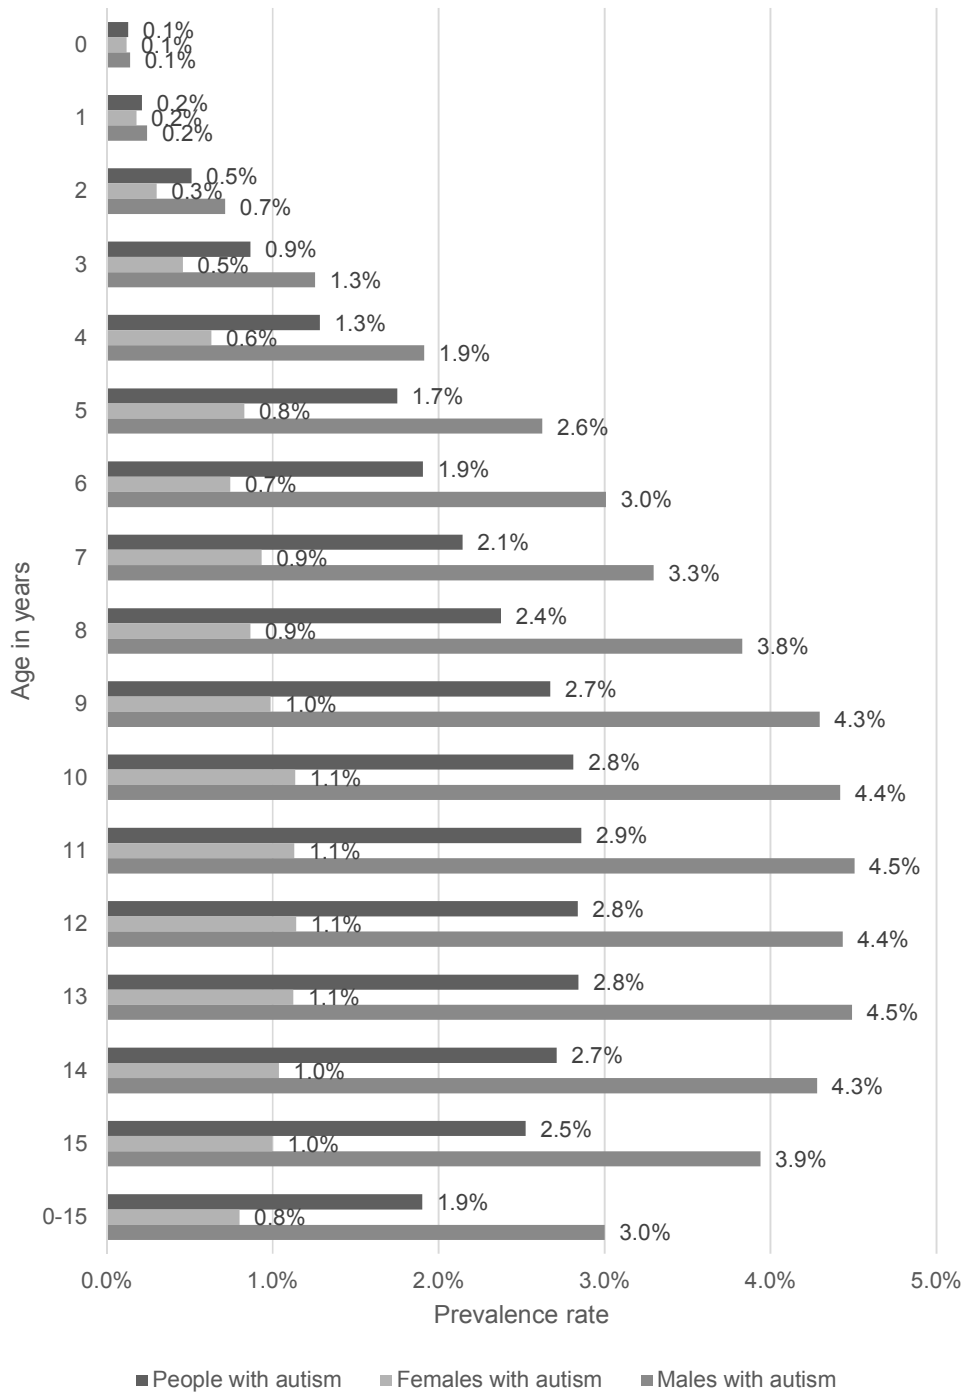

**STROBE 2007 (v4) Statement—Checklist of items that should be included in reports of *cross-sectional studies***

| Section/Topic                | Item # | Recommendation                                                                                                                                                                       | Reported on page #                                                               |
|------------------------------|--------|--------------------------------------------------------------------------------------------------------------------------------------------------------------------------------------|----------------------------------------------------------------------------------|
| Title and abstract           | 1      | (a) Indicate the study's design with a commonly used term in the title or the abstract                                                                                               | Page 1                                                                           |
|                              |        | (b) Provide in the abstract an informative and balanced summary of what was done and what was found                                                                                  | Page 2                                                                           |
| <b>Introduction</b>          |        |                                                                                                                                                                                      |                                                                                  |
| Background/rationale         | 2      | Explain the scientific background and rationale for the investigation being reported                                                                                                 | Page 4-5<br>Section: Introduction                                                |
| Objectives                   | 3      | State specific objectives, including any prespecified hypotheses                                                                                                                     | Page 5<br>Section: Introduction                                                  |
| <b>Methods</b>               |        |                                                                                                                                                                                      |                                                                                  |
| Study design                 | 4      | Present key elements of study design early in the paper                                                                                                                              | Page 5-8<br>Sections:<br>Methods/Procedures,<br>Data source, Census<br>variables |
| Setting                      | 5      | Describe the setting, locations, and relevant dates, including periods of recruitment, exposure, follow-up, and data collection                                                      | Page 5-6<br>Sections:<br>Methods/Procedures,<br>Data source                      |
| Participants                 | 6      | (a) Give the eligibility criteria, and the sources and methods of selection of participants                                                                                          | Page 5-8<br>Sections: Methods/Data<br>source, Census variables                   |
| Variables                    | 7      | Clearly define all outcomes, exposures, predictors, potential confounders, and effect modifiers. Give diagnostic criteria, if applicable                                             | Page 6-8<br>Section: Methods/Census<br>variables                                 |
| Data sources/<br>measurement | 8*     | For each variable of interest, give sources of data and details of methods of assessment (measurement). Describe comparability of assessment methods if there is more than one group | Page 6-8<br>Section: Methods/Census<br>variables                                 |
| Bias                         | 9      | Describe any efforts to address potential sources of bias                                                                                                                            | Page 5-8                                                                         |



|                        |     |                                                                                                                                                                                                   |                                                                                                                                         |
|------------------------|-----|---------------------------------------------------------------------------------------------------------------------------------------------------------------------------------------------------|-----------------------------------------------------------------------------------------------------------------------------------------|
|                        |     |                                                                                                                                                                                                   | Section: Methods                                                                                                                        |
| Study size             | 10  | Explain how the study size was arrived at                                                                                                                                                         | Page 5-8<br>Sections: Methods/Data source, Census variables                                                                             |
| Quantitative variables | 11  | Explain how quantitative variables were handled in the analyses. If applicable, describe which groupings were chosen and why                                                                      | Page 8<br>Section: Methods/Data analysis                                                                                                |
| Statistical methods    | 12  | (a) Describe all statistical methods, including those used to control for confounding                                                                                                             | Page 8<br>Section: Methods/Data analysis                                                                                                |
|                        |     | (b) Describe any methods used to examine subgroups and interactions                                                                                                                               | Page 8<br>Section: Methods/Data analysis                                                                                                |
|                        |     | (c) Explain how missing data were addressed                                                                                                                                                       | Page 5-8<br>Sections: Methods/Data source, Census variables                                                                             |
|                        |     | (d) If applicable, describe analytical methods taking account of sampling strategy                                                                                                                | N/A                                                                                                                                     |
|                        |     | (e) Describe any sensitivity analyses                                                                                                                                                             | N/A                                                                                                                                     |
| <b>Results</b>         |     |                                                                                                                                                                                                   |                                                                                                                                         |
| Participants           | 13* | (a) Report numbers of individuals at each stage of study—eg numbers potentially eligible, examined for eligibility, confirmed eligible, included in the study, completing follow-up, and analysed | Page 9<br>Section: Results/Number (%) of children and young people with autism by age and gender<br>Page 17 Table 2<br>Page 20 Figure 1 |
|                        |     | (b) Give reasons for non-participation at each stage                                                                                                                                              | N/A                                                                                                                                     |
|                        |     | (c) Consider use of a flow diagram                                                                                                                                                                | N/A                                                                                                                                     |
| Descriptive data       | 14* | (a) Give characteristics of study participants (eg demographic, clinical, social) and information on exposures and potential confounders                                                          | Page 9<br>Section: Results/Number (%) of children and young                                                                             |

|                   |     |                                                                                                                                                                                                                |                                                                                                                               |
|-------------------|-----|----------------------------------------------------------------------------------------------------------------------------------------------------------------------------------------------------------------|-------------------------------------------------------------------------------------------------------------------------------|
|                   |     |                                                                                                                                                                                                                | people with autism by age and gender<br>Page 17 Table 2<br>Page 20 Figure 1                                                   |
|                   |     | (b) Indicate number of participants with missing data for each variable of interest                                                                                                                            | Page 6-8<br>Sections: Methods/<br>Census variables                                                                            |
| Outcome data      | 15* | Report numbers of outcome events or summary measures                                                                                                                                                           | N/A                                                                                                                           |
| Main results      | 16  | (a) Give unadjusted estimates and, if applicable, confounder-adjusted estimates and their precision (e.g., 95% confidence interval). Make clear which confounders were adjusted for and why they were included | Page 9-10<br>Section: Results/General health<br>Page 18 Table 3<br>Page 19 Tables 4 and 5                                     |
|                   |     | (b) Report category boundaries when continuous variables were categorized                                                                                                                                      | Page 8<br>Section: Methods/Data analysis<br>Page 17 Table 2<br>Pages 18 Table 3<br>Page 19 Tables 4 and 5<br>Page 20 Figure 1 |
|                   |     | (c) If relevant, consider translating estimates of relative risk into absolute risk for a meaningful time period                                                                                               | N/A                                                                                                                           |
| Other analyses    | 17  | Report other analyses done—eg analyses of subgroups and interactions, and sensitivity analyses                                                                                                                 | N/A                                                                                                                           |
| <b>Discussion</b> |     |                                                                                                                                                                                                                |                                                                                                                               |
| Key results       | 18  | Summarise key results with reference to study objectives                                                                                                                                                       | Page 10-12<br>Section: Discussion/<br>Principal findings and interpretation,<br>Comparison with existing literature           |
| Limitations       | 19  | Discuss limitations of the study, taking into account sources of potential bias or imprecision. Discuss both direction and magnitude of any potential bias                                                     | Page 12<br>Section: Strengths and                                                                                             |

1  
2  
3  
4  
5  
6  
7  
8  
9  
10  
11  
12  
13  
14  
15  
16  
17  
18  
19  
20  
21  
22  
23  
24  
25  
26  
27  
28  
29  
30  
31  
32  
33  
34  
35  
36  
37  
38  
39  
40  
41  
42  
43  
44  
45  
46  
47

|                          |    |                                                                                                                                                                            |                                                                                                                     |
|--------------------------|----|----------------------------------------------------------------------------------------------------------------------------------------------------------------------------|---------------------------------------------------------------------------------------------------------------------|
|                          |    |                                                                                                                                                                            | limitations                                                                                                         |
| Interpretation           | 20 | Give a cautious overall interpretation of results considering objectives, limitations, multiplicity of analyses, results from similar studies, and other relevant evidence | Page 10-12<br>Section: Discussion/<br>Principal findings and interpretation,<br>Comparison with existing literature |
| Generalisability         | 21 | Discuss the generalisability (external validity) of the study results                                                                                                      | Page 12-13<br>Section: Implications for clinicians                                                                  |
| <b>Other information</b> |    |                                                                                                                                                                            |                                                                                                                     |
| Funding                  | 22 | Give the source of funding and the role of the funders for the present study and, if applicable, for the original study on which the present article is based              | Page 14<br>Section: Funding                                                                                         |

\*Give information separately for exposed and unexposed groups.

**Note:** An Explanation and Elaboration article discusses each checklist item and gives methodological background and published examples of transparent reporting. The STROBE checklist is best used in conjunction with this article (freely available on the Web sites of PLoS Medicine at <http://www.plosmedicine.org/>, Annals of Internal Medicine at <http://www.annals.org/>, and Epidemiology at <http://www.epidem.com/>). Information on the STROBE Initiative is available at [www.strobe-statement.org](http://www.strobe-statement.org).

# BMJ Open

## Age at identification, prevalence, and general health of children with autism - observational study of a whole country population

|                                 |                                                                                                                                                                                                                                                                                                                                                                                                                                                                                                                                                                                                                           |
|---------------------------------|---------------------------------------------------------------------------------------------------------------------------------------------------------------------------------------------------------------------------------------------------------------------------------------------------------------------------------------------------------------------------------------------------------------------------------------------------------------------------------------------------------------------------------------------------------------------------------------------------------------------------|
| Journal:                        | <i>BMJ Open</i>                                                                                                                                                                                                                                                                                                                                                                                                                                                                                                                                                                                                           |
| Manuscript ID                   | bmjopen-2018-025904.R1                                                                                                                                                                                                                                                                                                                                                                                                                                                                                                                                                                                                    |
| Article Type:                   | Research                                                                                                                                                                                                                                                                                                                                                                                                                                                                                                                                                                                                                  |
| Date Submitted by the Author:   | 10-Apr-2019                                                                                                                                                                                                                                                                                                                                                                                                                                                                                                                                                                                                               |
| Complete List of Authors:       | Rydzewska, Ewelina; University of Glasgow Mental Health and Wellbeing, Institute of Health and Wellbeing<br>Hughes-McCormack, Laura; University of Glasgow Mental Health and Wellbeing, Institute of Health and Wellbeing<br>Gillberg, Christopher; University of Glasgow Institute of Health and Wellbeing<br>Henderson, Angela; University of Glasgow Mental Health and Wellbeing, Institute of Health and Wellbeing<br>MacIntyre, Cecilia; National Records of Scotland<br>Rintoul, Julie; Scottish Government Health and Social Care Analysis<br>Cooper, Sally-Ann; University of Glasgow Mental Health and Wellbeing |
| <b>Primary Subject Heading</b>: | Public health                                                                                                                                                                                                                                                                                                                                                                                                                                                                                                                                                                                                             |
| Secondary Subject Heading:      | Epidemiology                                                                                                                                                                                                                                                                                                                                                                                                                                                                                                                                                                                                              |
| Keywords:                       | autism, general health, children, young people, prevalence                                                                                                                                                                                                                                                                                                                                                                                                                                                                                                                                                                |
|                                 |                                                                                                                                                                                                                                                                                                                                                                                                                                                                                                                                                                                                                           |

SCHOLARONE™  
Manuscripts

1  
2  
3 **Age at identification, prevalence, and general health of children with autism -**  
4 **observational study of a whole country population**  
5  
6

7 Ewelina Rydzewska, Laura A Hughes-McCormack, Christopher Gillberg, Angela Henderson,  
8 Cecilia MacIntyre, Julie Rintoul, Sally-Ann Cooper  
9

10 Institute of Health and Wellbeing, University of Glasgow, Mental Health and Wellbeing  
11 Group, 1st Floor, Administrative Building, Gartnavel Royal Hospital, 1055 Great Western  
12 Road, Glasgow G12 0XH, UK  
13 Ewelina Rydzewska  
14 Research Associate  
15  
16

17 Institute of Health and Wellbeing, University of Glasgow, Mental Health and Wellbeing  
18 Group, 1st Floor, Administrative Building, Gartnavel Royal Hospital, 1055 Great Western  
19 Road, Glasgow G12 0XH, UK  
20 Laura A Hughes-McCormack  
21 Research Assistant  
22

23 1 Göteborgs Universitet/University of Gothenburg, Gillbergcentrum/Gillberg Neuropsychiatry  
24 Centre, Kungsgatan 12, S-411 19 Göteborg, Sweden  
25 2 Institute of Health and Wellbeing, University of Glasgow, Mental Health and Wellbeing  
26 Group, 1st Floor, Administrative Building, Gartnavel Royal Hospital, 1055 Great Western  
27 Road, Glasgow G12 0XH, UK  
28 Christopher Gillberg  
29 Professor of Child and Adolescent Psychiatry  
30  
31

32 Institute of Health and Wellbeing, University of Glasgow, Mental Health and Wellbeing  
33 Group, 1st Floor, Administrative Building, Gartnavel Royal Hospital, 1055 Great Western  
34 Road, Glasgow G12 0XH, UK  
35 Angela Henderson  
36 Scottish Learning Disabilities Observatory Deputy Director  
37

38 Census User Needs, Content and Benefits, National Records of Scotland, Ladywell House,  
39 Edinburgh EH12 7TF, UK  
40 Cecilia MacIntyre  
41 Statistician  
42

43 Health & Social Care Analysis, Scottish Government, St. Andrew's House, Regent Road,  
44 Edinburgh EH1 3DG, UK  
45 Julie Rintoul  
46 Statistician  
47

48 Institute of Health and Wellbeing, University of Glasgow, Mental Health and Wellbeing  
49 Group, 1st Floor, Administrative Building, Gartnavel Royal Hospital, 1055 Great Western  
50 Road, Glasgow G12 0XH, UK  
51 Sally-Ann Cooper  
52 Professor of Learning Disabilities  
53  
54

55 **Corresponding author:**  
56 Professor Sally-Ann Cooper  
57 Email: [Sally-Ann.Cooper@glasgow.ac.uk](mailto:Sally-Ann.Cooper@glasgow.ac.uk)  
58  
59  
60

## Abstract

### Objectives:

Reported childhood prevalence of autism varies considerably between studies and over time, and general health status has been little investigated. We aimed to investigate contemporary prevalence of reported autism by age, and general health status of children/young people with and without autism.

### Design:

Secondary analysis of Scotland's Census, 2011 data. Cross-sectional study.

### Setting:

General population of Scotland.

### Participants:

All children (n=916,331) and young people (n=632,488) in Scotland.

### Main outcome measures:

Number (%) of children/young people reported to have autism; and their general health status. Prevalence of autism; prevalence of poor health (fair, bad and very bad health); odds ratios (OR: 95% confidence intervals) of autism predicting poor health, adjusted for age and gender; and OR for age and gender in predicting poor health within the population with reported autism.

### Results:

Autism was reported for 17,348/916,331 (1.9%) children aged 0-15, and 7,715/632,488 (1.2%) young people aged 16-24. The rate increased to age 11 in boys and age 10 in girls, reflecting age at diagnosis. Prevalence was 2.8% at age 10 (4.4% for boys; 1.1% for girls), and 2.9% at age 11 (4.5% for boys; 1.1% for girls). 22.0% of children and 25.5% of young people with autism reported poor health, compared with 2.0% and 4.4% without autism. Autism had OR=11.3 (11.0-11.7) in predicting poor health. Autistic females had poorer health than autistic males; OR=1.6 (1.5-1.7).

### Conclusion:

Accurate information on the proportion of autistic children and their health status is essential to accurately plan appropriate prevention and intervention measures and provide resources for those who may put demand upon services designed for autistic people.

**Keywords:** autism, general health, children, young people, prevalence.

**Strengths and limitations of this study:**

- Large, whole country population study
- High response rate of 94%, and systematic enquiry of everyone regarding autism and their general health status
- Results are generalisable to other child and young people populations in high-income countries
- Autism and general health status were self/proxy reported by respondents rather than each person having a clinical assessment
- 6% of records were imputed

## Introduction

Reports on the prevalence of autism inevitably depend upon the criteria used. The concept of autism spectrum disorders has now broadened considerably beyond original descriptions.<sup>1,2</sup> and clinicians also now base their diagnosis on fewer symptoms than a decade ago.<sup>3</sup> Additionally, there is now increased awareness about autism. Hence the reported prevalence of autism has increased. Several systematic reviews have attempted to synthesise research studies on prevalence, with overall prevalence varying, dependent upon the studies included, e.g. their age-ranges, years the studies were conducted in (and hence criteria), data-collection methods, size, and representativeness of included studies. Even when restricted to studies published since 2000, studies selected for inclusion in the reviews have shown wide ranges in reported prevalence.<sup>4-7</sup> Recent reviews are summarised in Table 1.

- Insert Table 1 here -

The included age-range in studies is likely to be critical in these reported rates, related to the age at which children are diagnosed. This, however, seems to be little investigated. A California, USA study demonstrated that as well as rates of diagnosis of autism increasing, this was particularly so amongst preschool children,<sup>8</sup> whilst a large Swedish study found that the number of autism symptoms in children diagnosed with autism had fallen in children diagnosed at age 7-12 years, but not at age 1-6 years.<sup>3</sup> In the National Survey of Children's Health, USA, 259 (24.6%) of children with autism were diagnosed at younger than 3 years of age, 479 (44.5%) at 3-5 years, and 383 (30.9%) at over 5 years of age.<sup>9</sup> A review has suggested there remains considerable variation in age at diagnosis.<sup>10</sup> Further current data is clearly needed.

One reason why it is important to understand prevalence of autism, is that the health profile of children and young people with autism is thought to differ from that of typically developing children and requires interventions and supports.<sup>11-13</sup> Therefore, these combined factors, i.e. knowledge of prevalence and health profile of autistic children, are essential for planning and delivery of services.



1  
2  
3 Subjective general health status is commonly measured in general population studies,  
4 and has been demonstrated to be extremely valid, with a strongly predictive linear  
5 gradient across health status (from best to poorest) being associated with subsequent  
6 number of medical appointments, hospital admissions, and mortality.<sup>14-17</sup> It is,  
7 therefore, important to measure if there are general health status differences in  
8 children and young people with autism compared with other children. However, in  
9 terms of general health status of children and young people with autism, there has  
10 been very little research. A study in USA reported parent-rated general health for 895  
11 young people with autism aged 13-25 years at baseline, at five time points across  
12 2001-2009, but did not include a general population comparison group.<sup>18</sup> General  
13 health was rated as excellent, very good, good, or fair/poor. Fair/poor ratings were  
14 reported for 6.6% in 2001, 6.4% in 2003, 7.6% in 2005, 6.1% in 2007, and 6.6% in  
15 2009.<sup>18</sup> A large study presenting data from the 2011-2012 National Survey of  
16 Children's Health identified 1,188/56,746 children with autism under the age of 18,  
17 who were found to have significantly lower log odds of health (-1.30,  $p < 0.001$ )  
18 compared to all other children.<sup>19</sup>

19  
20  
21 To our knowledge, no other studies have investigated reported general health status  
22 of children and young people with autism, nor drawn direct comparisons with the  
23 general population. This appears to be a major gap in our knowledge.

24  
25  
26 This study aimed to investigate, on a large scale (the entire population of a country;  
27 Scotland) (1) the prevalence of autism, and age of reporting/identifying autism in  
28 childhood, and (2) the general health status of children and young people with autism  
29 compared with those without autism.

## 30 31 32 **Methods**

### 33 34 35 **Procedures**

36 Approval was gained from the Scottish Government for secondary analysis of  
37 Scotland's Census, 2011 data under the auspices of a collaborative research project  
38 with National Records of Scotland.

## Data source

Scotland's Census, 2011 provides information on the number and characteristics of Scotland's population and households on the census day, 27 March 2011. The census is undertaken every 10 years. It includes the whole Scottish population: people living in communal establishments (such as care homes and student halls of residence) as well as people living in private households. Scotland's Census is one of the few country censuses, and indeed it may be unique, in identifying people with autism. One householder on behalf of all occupants in private households, and manager on behalf of all occupants in communal dwellings, was required to complete the Census information. In the great majority of cases this was, therefore, a parent of the child/young person. The Census form clearly stated it is a legal requirement to complete the Census, and that not completing it, or supplying false information, can result in a £1,000 fine. The Census team conducted follow up of non-responders, and provided help to respond when that was needed, hence the high completion rate of 94%.<sup>20</sup> For 2011, the UK Census Offices endorsed CANCEIS (Canadian Census Edit and Imputation System) as the cornerstone of the 2011 Census Editing Strategy. CANCEIS performs robust, cost effective, editing and imputation whilst incorporating methodological best practice. The Census team used a Census Coverage Survey, including around 40,000 households, to estimate numbers and characteristics of the missing 6%. The Coverage Survey and Census records were deterministically matched using automated and clerical matching to check for duplicates. Individuals estimated to have been missed from the Census were then imputed using a subset of characteristics from real individuals, including information on their health. The edit and imputation methodology was adapted from the rigorous and systematic guidelines of the UK's largest independent producer of official statistics and the recognised national statistical institute of the UK.<sup>21</sup> Two further Scottish Government reports provide information on the estimation and adjustment process used to produce census population estimates for Scotland<sup>22</sup> as well as full details of the methods and other background information.<sup>23</sup>

## Census variables

People with autism were identified from Census question 20, which asked: 'Do you have any of the following conditions which have lasted, or are expected to last, at least

1  
2  
3 12 months? Tick all that apply'. There was a choice of 10 response options, which  
4 included: Developmental disorder (for example, Autistic Spectrum Disorder or  
5 Asperger's Syndrome), Learning disability (for example, Down's Syndrome), Learning  
6 difficulty (for example, dyslexia), and Mental health condition.  
7  
8  
9

10  
11 During the methodology development for Scotland's Census, 2011, Ipsos MORI  
12 Scotland was commissioned to undertake cognitive question testing on question 20  
13 on long-term health conditions and disabilities. This was to test whether the questions  
14 were answered accurately and willingly by respondents, and to identify any changes  
15 needed to improve data quality and/or the acceptability of the response options for the  
16 Scottish population. Cognitive interviewing is a widely used approach to critically  
17 evaluate and improve survey questionnaires.<sup>24</sup> It enables researchers to modify  
18 survey material to enhance clarity. Retrospective probing was selected as the most  
19 appropriate technique. The questions were tested with 102 participants with a mix of  
20 gender, age and health conditions and disabilities (including people with more than  
21 one of the conditions), to ensure accurate and willing completion.<sup>25</sup> They included  
22 people with autism, intellectual disabilities, dyslexia, dyspraxia, speech impairment,  
23 mental health conditions (both milder and more serious), and other long-term  
24 conditions. This resulted in a redesign of the question on autism, to 'Developmental  
25 disorder, (for example Autism Spectrum Disorder or Asperger's Syndrome)' in order  
26 to accurately capture specifically the data on autism. The questions on the other  
27 conditions tested (some of which, from a medical perspective, can be considered as  
28 developmental disorders) did not require any modification.  
29  
30  
31  
32  
33  
34  
35  
36  
37  
38  
39  
40  
41  
42

43 Hence the choice of wording of the question on autism was informed and carefully  
44 considered. The term developmental disorder was used and only prompted  
45 respondents to reply with regards to autistic spectrum disorder or Asperger syndrome,  
46 and the question distinguished autism from learning disability (which in the UK is  
47 synonymous with the international term 'intellectual disabilities'), learning difficulties  
48 such as dyslexia, and mental health conditions.  
49  
50  
51  
52  
53  
54

55 The Census team imputed answers for the 14.7% who did not tick any of the boxes in  
56 question 20, based on their free text answers for this question and answers to other  
57 health questions in the Census, which increased the completion rate to 97.4%. For the  
58  
59  
60

1  
2  
3 remaining 2.6%, the Census team assumed the most plausible explanation was that  
4 the person had no long-term condition but did not see the 'No condition' check box at  
5 the end of the question, and hence recorded them as such.<sup>26</sup>  
6  
7  
8  
9

10 Information on general health status was collected through question 19 which had a  
11 five-point response scale: 'How is your health in general?' (1) very good, (2) good, (3)  
12 fair, (4) bad, (5) very bad. Similarly, as for question 20, question 19 was tested during  
13 the cognitive question testing during the development of the Census. The question  
14 was found to not require any modification.  
15  
16  
17  
18  
19

### 20 **Data analysis**

21 We calculated the number and percentage of children reported to have autism, by age  
22 and gender. We also calculated the number and percentage of children and young  
23 people with and without autism reporting very good, good, fair, bad, and very bad  
24 health, and compared differences using chi-square tests. Within the whole population  
25 of children and young people in Scotland, we then used a logistic regression to  
26 calculate odds ratios (OR; with 95% confidence intervals) of autism predicting a  
27 derived, dichotomised variable of poor health (fair, bad, or very bad health) versus  
28 good health (very good or good health), adjusted for age and gender. Age was  
29 categorised into groups of 0-15 years (children), or 16-24 years (youth), with the 0-15-  
30 year olds being the reference group. The age groups were selected as in Scotland full  
31 legal capacity, with some limitations, is granted to people aged 16 and over. Gender  
32 was binary; the reference group was male. We then calculated the ORs of age and  
33 gender in predicting poor health within the population with autism. All analyses were  
34 conducted with SPSS software version 22.  
35  
36  
37  
38  
39  
40  
41  
42  
43  
44  
45  
46  
47

### 48 **Patient and Public Involvement**

49 The question on autism was included in Scotland's Census, 2011 at the behest of third  
50 sector organisations for people with autism. People with autism took part in the  
51 cognitive question testing during the planning of the Census. This study was  
52 undertaken by the Scottish Learning Disabilities Observatory, which has a specific  
53 remit for people with autism; its steering group includes partners from third sector  
54 organisations. Results from this study will be disseminated for people with autism in  
55  
56  
57  
58  
59  
60

1  
2  
3 easy-read version via the Scottish Learning Disabilities Observatory website and  
4 newsletters.  
5  
6  
7

## 8 **Results**

### 11 **Number (%) of children and young people with autism by age and gender**

12 Scotland's Census, 2011 includes records on 916,331 children aged 0-15 years and  
13 632,488 young people aged 16-24 years. Autism was reported for 17,348 (1.9%) of  
14 the children, and 7,715 (1.2%) of the young people. Table 2 and Figure 1 show the  
15 age and gender distribution of the children with and without autism. As expected, there  
16 are more males than females with autism; 13,841/17,348 (79.8%) of children with  
17 autism were male. The rate of reported autism increased to age 11 in boys and age  
18 10 in girls, being relatively similar across ages 9-15 years for both genders, reflecting  
19 the ages at which the autism was diagnosed in the population. Prevalence was 2.8%  
20 at age 10 years (4.4% for boys and 1.1% for girls), and 2.9% at age 11 years (4.5%  
21 for boys and 1.1% for girls).  
22  
23  
24  
25  
26  
27  
28  
29  
30  
31

32 - Insert Table 2 here -  
33  
34

35 - Insert Figure 1 here -  
36  
37  
38

### 39 **General health**

40 Table 3 shows reported general health status of children and young people with and  
41 without autism in Scotland. The children and young people with autism reported poorer  
42 health; 22.0% of children and 25.5% of young people with autism reported poor (fair,  
43 bad, or very bad) general health, compared with only 2.0% of children and 4.4% of  
44 young people without autism ( $\chi^2=29365.6$ ;  $df=1$ ;  $p<0.001$  for children, and  $\chi^2=7652.1$ ;  
45  $df=1$ ;  $p<0.001$  for young people). Table 3 shows that the discrepancy between those  
46 with and without autism was greater for females than males, for children rather than  
47 young people, and was even more prominent when comparing bad/very bad health  
48 (as opposed to fair/bad/very bad health), e.g. 9.1% of girls with autism had bad/very  
49 bad health compared with only 0.4% of girls without autism.  
50  
51  
52  
53  
54  
55  
56  
57  
58  
59  
60

1  
2  
3 - Insert Table 3 here -  
4  
5

6  
7 Table 4 shows the results from the regression with the whole population data. Autism  
8 had OR=11.3 (11.0-11.7, 95% CI) in predicting poor health, adjusted for gender and  
9 age. Young people were more likely to have poor health than children, as were  
10 females. This pattern was also seen within the autistic population, more markedly so  
11 for females, and less so for increasing age when compared with the whole population  
12 (Table 5). Female gender had OR=1.6 (1.5-1.7, 95% CI), and age 16-24 years had  
13 OR=1.2 (1.1-1.3, 95% CI) in predicting poor health within the autistic population.  
14  
15  
16  
17  
18  
19

20 - Insert Table 4 here -  
21  
22

23  
24 - Insert Table 5 here -  
25  
26

## 27 Discussion

### 30 Principle findings and interpretation

31 We identified the prevalence of reported autism to be 1.9% in children aged 0-15 years  
32 overall, and that the reported rate increased with age up to age 10 years in girls and  
33 11 years in boys, reflecting the age at which it was identified/diagnosed. Almost all  
34 were identified by age 9 years, with the majority before primary school. Prevalence  
35 was 2.8% at age 10 years, and 2.9% at age 11 years; higher than when the rate is  
36 reported for all children overall. This is of importance when interpreting prevalence  
37 studies, as autism in early childhood will clearly be under-reported so lowering the  
38 overall reported childhood prevalence, unless detailed individual assessments are  
39 undertaken which is not realistic in large scale population-based research. Our study  
40 is the only whole-country population study we are aware of to-date to report  
41 prevalence of autism using current concepts of the autism spectrum and is highly  
42 representative as autism was systematically enquired about for the entire population,  
43 with a 94% response rate. Of considerable significance, we report that children/young  
44 people with autism were more than 11 times more likely to have poor health than the  
45 rest of the population. This inequality was greater for females than males, and more  
46 so than in the general population.  
47  
48  
49  
50  
51  
52  
53  
54  
55  
56  
57  
58  
59  
60

## Comparison with existing literature

We found a higher rate of autism than that in the most recent systematic reviews on the subject. This finding most likely reflects that the data is more recent (2011) compared to the most recent reviews, which included data from studies completed a decade earlier, and that we report by year of age, rather than just for all children combined. More comparable studies include the Stockholm Youth Cohort which reported rates of autism in 2011 of 0.40% at age 0-5 years, 1.74% at age 6-12 years, 2.46% at age 13-17 years, and 1.76% at age 18-27 years; and of 1.44% at ages 0-17 years overall.<sup>27</sup> The Data Resource Center for Child & Adolescent Health findings for 2014<sup>28</sup> and 2016<sup>9</sup> report higher prevalence of autism at 2.2% (n=243) and 2.5% (n=1,131) in all 3-17-year olds but is on a smaller scale. The Autism and Developmental Disabilities Monitoring Network, in 11 sites in the USA, provides estimates of the prevalence of autism in 8-year-old children.<sup>29</sup> In 2014 this varied across sites from 1.3% to 2.9%, with a combined prevalence of 1.7%.<sup>29</sup>

Reported general health was substantially poorer for children and young people with autism compared with the general population. However, there is limited previous research with which to compare our findings; indeed, we believe we are the first to study general health status compared directly with the general population in a whole country population of children and young people with autism. Our findings of poor (fair, bad, or very bad) health in 2.0% of children and 4.4% of young people without autism are similar to those reported in a National Health Interview Survey in 2014 which found fair/poor health for 1.6% (n=234) of children aged 0-17 years.<sup>28</sup> However, it did not report health status separately for children with autism. A further USA study reported lower rates of fair/poor health than the 25.5% we found in the young people with autism.<sup>18</sup> It reported fair/poor health in 6.6% in 2001, 6.4% in 2003, 7.6% in 2005, 6.1% in 2007, and 6.6% in 2009 of 895 young people with autism aged 13-25 years at baseline, but did not have a general population comparison group.<sup>18</sup> However, it used measures of health not directly comparable with our study, using a four-point scale of excellent, very good, good, and fair/poor health.<sup>18</sup> Our findings of odds ratio of 11.3 for autism predicting poor general health in the whole population of children and young people are not directly comparable with the findings from the National Survey of

1  
2  
3 Children's Health from 2011-2012, due to differences in the scales used, though the  
4 results are in the same direction.<sup>19</sup>  
5  
6  
7

8 Young people with autism had poorer health than children with autism, but the extent  
9 of this difference was much less than that seen in the general population. The  
10 difference in the extent of influence of age category between the people with and  
11 without autism lies in the substantial inequalities in general health that are associated  
12 with having autism, regardless of age. Our findings show that children and young  
13 people with autism of all ages are more likely to experience poorer general health  
14 compared to the rest of the population. We are unable to explain the reasons for this,  
15 but note that it is in addition to, and may be related to, their increase in comorbidities  
16 compared with other children and young people.<sup>11-13</sup> This requires further  
17 investigation.  
18  
19  
20  
21  
22  
23  
24  
25  
26

### 27 **Strengths and limitations**

28 This large-scale study covers the whole population of Scotland and we believe it is  
29 currently unique in being a whole country study in which every citizen was  
30 systematically enquired about regarding having autism and their general health status.  
31 It also had a high completion rate at 94%, suggesting the results are highly  
32 representative and likely to be generalisable to other high-income countries.  
33 Limitations include the use of the term of 'developmental disorders' in the Census.  
34 However, it prompted responses only for the examples of autistic spectrum disorder  
35 or Asperger's syndrome, and was tested prior to its use at the Census. Furthermore,  
36 the developmental disorders category was distinguished from intellectual disabilities,  
37 learning difficulties, and mental health conditions, which are important distinctions. The  
38 wording of the question on autism was informed in advance by the cognitive question  
39 testing procedure. Hence, we consider that respondents will have replied accordingly,  
40 i.e. regarding autism. However, we have no means to check this. Respondents  
41 reported whether or not each child/young person was known to have autism rather  
42 than each person having an assessment for autism. We are unable to report on the  
43 age that each child/young person received their diagnosis; hence we report instead  
44 the number of children at each age who have received the diagnosis. They are the  
45 proportion at each age who will call upon services for children/young persons with  
46  
47  
48  
49  
50  
51  
52  
53  
54  
55  
56  
57  
58  
59  
60



1  
2  
3 autism, so this information is important for service planning. Some reporting error is  
4 possible, but we are unable to check this. The majority of reports were proxy-reports  
5 by parents, but we do not know the extent of proxy versus self-reports for the young  
6 people. Neither do we know the extent to which proxy-reporting of general health  
7 status compares with an individual's report. The general health status responses were  
8 subjective measurements, which might have been influenced by a variety of factors  
9 such as carer burden. It is controversial as to whether autism can be diagnosed in very  
10 young children. We found that a small number did report it in the first two years. Whilst  
11 there may be some reporting error, differences in development in autistic children have  
12 been reported to be apparent from as early as 6 months, and widespread by 18  
13 months.<sup>30</sup> The data from this study were collected in 2011, so it will not have captured  
14 any changes that have occurred since then. Whilst we described the imputation  
15 process, we cannot state with certainty whether the imputed 6% of records contained  
16 the same, more or fewer proportion of children and young people with reported autism  
17 but note that this missing 6% is a small proportion overall. Imputation of zero by the  
18 Census team on the 2.6% of the population with missing data on long-term conditions  
19 was not tested, though considered to be the most plausible explanation. Despite these  
20 limitations, we believe the results of this study are generalisable to other high-income  
21 countries and fill a significant gap in existing research on general health status of  
22 children and young people with autism.  
23  
24  
25  
26  
27  
28  
29  
30  
31  
32  
33  
34  
35  
36  
37  
38  
39

### 40 **Implications for clinicians**

41 It is essential to have accurate information on the proportion of children and young  
42 people who are known to have autism, and their health status, in order to accurately  
43 plan appropriate prevention and intervention measures, and provision of resources for  
44 those people who may put demand upon services designed for people with autism.  
45 This requires a full understanding of age differences, and age at diagnosis. The poor  
46 general health status observed in the population of children and young people with  
47 autism demonstrates a clear need to focus on improvements in healthcare and  
48 supports, and the wider determinants of health in this group, which may well differ from  
49 the general population.  
50  
51  
52  
53  
54  
55  
56  
57  
58  
59  
60

**Word count: 3,539**

**Acknowledgements:**

We thank the National Records of Scotland for assisting with the data analysis and dissemination stages of the project.

**Contributors:**

ER analysed the data, jointly interpreted it, and wrote the first draft of the manuscript, LAH-M, CG, and AH jointly interpreted the data, and contributed to the manuscript, CM and JR worked on the Census, jointly interpreted the data, and contributed to the manuscript, S-AC conceived the project, interpreted the data, and contributed to the manuscript. All authors approved the final version of the manuscript. S-AC is the study guarantor.

S-AC confirms the manuscript is an honest, accurate and transparent account of the study being reported, that no important aspects of the study have been omitted, and there has been no discrepancies from the study as planned.

**Funding:**

This study was funded by the Medical Research Council (grant reference MC\_PC\_17217) and the Scottish Government via the xxx. The funders had no role in the study design, collection, analyses and interpretation of data, in writing the report, nor in the decision to submit the article for publication.

**Competing interests:**

All authors have completed the Unified Competing Interest form (available on request from the corresponding author) at [www.icmje.org/coi\\_disclosure.pdf](http://www.icmje.org/coi_disclosure.pdf) and declare: all authors had financial support from the Scottish Government for the submitted work; no financial relationships with any organisations that might have an interest in the submitted work in the previous three years; no other relationships or activities that could appear to have influenced the submitted work.

**Patient consent:**

Not applicable

**Ethical approval:**

Permission to access data was granted by the Scottish Government.

**Provenance and peer review:**

Not commissioned; externally peer reviewed.

**Data sharing statement:**

Data available at:

<http://www.scotlandscensus.gov.uk/ods-web/data-warehouse.html#additionaltab>

## References

1. Kanner L. Autistic disturbances of affective contact. *Nervous Child* 1943;2:217-250.
2. Asperger H. Die 'autistischen psychopathen' im kindersalter (autistic psychopathology of childhood). *Archiv für Psychiatrie und Nervenkrankheiten* 1944;177:76-136.
3. Arvidsson O, Gillberg C, Lichtenstein P, et al. Secular changes in the symptom level of clinically diagnosed autism. *J Child Psychol Psychiatry* 2018; doi:10.1111/jcpp.12864
4. French LR, Bertone A, Hyde KL, et al. Epidemiology of Autism Spectrum Disorders. In: Buxbaum J, Hof PR, eds. *The Neuroscience of Autism Spectrum Disorders*. New York: Academic Press 2013.
5. Elsabbagh M, Divan G, Koh YJ, et al. Global Prevalence of Autism and Other Pervasive Developmental Disorders. *Autism Res* 2012;5:160-179.
6. Tsai LY. Impact of DSM-5 on epidemiology of Autism Spectrum Disorder. *Res Autism Spectr Disord* 2014;8(11):1454-1470.
7. Adak R and Halder S. Systematic review on prevalence for autism spectrum disorder with respect to gender and socio-economic status. *J Ment Disord Treat* 2017;3(1):1-9.
8. Hertz-Picciotto I and Delwiche L. The Rise in Autism and the Role of Age at Diagnosis. *Epidemiol* 2009;20(1):84-90.
9. Data Resource Center for Child & Adolescent Health. *National Survey of Children's Health; 2016*. Available at: <http://childhealthdata.org/browse/survey>
10. Daniels AM and Mandell DS. Explaining differences in age at autism spectrum disorder diagnosis: A critical review. *Autism* 2014;18(5):583-597.
11. Fombonne E. Epidemiological Surveys of Autism and Other Pervasive Developmental Disorders: An Update. *J Autism Dev Disord* 2003;33(4):365-382.
12. Rydzewska E, Hughes-McCormack LA, Gillberg C, et al. Prevalence of sensory impairments, physical and intellectual disabilities, and mental health in children and young people with self/proxy-reported autism: Observational study of a whole country population. *Autism* 2018; 136236131879127.
13. Simonoff E, Pickles A, Charman T, et al. Psychiatric disorders in children with autism spectrum disorders: Prevalence, comorbidity and associated factors in a population-derived sample. *J Am Acad Child Adolesc Psychiatry* 2008;47:921-929.
14. Burnstrom B and Fredlund P. Self rated health: is it as good a predictor of subsequent mortality among adults in lower as well as in higher social classes? *J Epidemiol Community Health* 2001;55(11):836-840
15. Heistaro S, Jousilahti P, Lahelma E, et al. Self rated health and mortality: a long term prospective study in Eastern Finland. *J Epidemiol Community Health* 2001;55:227-232
16. Miilunpalo S, Vuori I, Oja P, et al. Self-rated health status as a health measure: the predictive value of self-reported health status on the use of physician services

- and on mortality in the working-age population. *J Clin Epidemiol* 1997;50(5):517-28.
17. Schnittker J and Bacak V. The increasing predictive validity of self-rated health. *PLOS One* 2014; <https://doi.org/10.1371/journal.pone.0084933>
  18. National Longitudinal Transition Study 2 (NLTS2). *Data Tables NLTS2 Waves 1 – 5; 2017*. Available at: [http://www.nlts2.org/data\\_tables/index.html](http://www.nlts2.org/data_tables/index.html)
  19. Ricles, B. The relationship between adverse childhood events, resiliency and health among children with autism. *J Autism Dev Disord* 2017;47(1):187-202.
  20. National Records of Scotland (NRS). *2011 Census Release 1C - How the 2011 Census population estimates were obtained*. Edinburgh: National Records of Scotland 2013.
  21. Office for National Statistics. Survey Methodology Bulletin No. 69 – September 2011. *Office for National Statistics* 2011; <https://webarchive.nationalarchives.gov.uk/20160108193745/http://www.ons.gov.uk/ons/guide-method/method-quality/survey-methodology-bulletin/smb-69/index.html>
  22. National Records of Scotland. 2011 Census. Release 1B - How the 2011 Census population estimates were obtained. *National Records of Scotland* 2013; <http://www.scotlandscensus.gov.uk/documents/censusresults/release1b/rel1bmethodology.pdf>
  23. National Records of Scotland. Scotland's Census 2011. Supporting information. *National Records of Scotland* 2011; <http://www.scotlandscensus.gov.uk/supporting-information>.
  24. Wills GB. *Cognitive Interviewing. A tool for improving questionnaire design*. Thousand Oaks: Sage Publications 2005.
  25. General Register Office for Scotland. 2011 Census Question Testing - The Health and Disability Questions (2009). *General Register Office for Scotland* 2009; <https://www.scotlandscensus.gov.uk/documents/research/2011-census-health-disability-questions.pdf>
  26. National Records of Scotland. Scotland's Census 2011 Data quality issues for the long-term health conditions question. *National Records of Scotland* 2017; [https://www.scotlandscensus.gov.uk/documents/supporting\\_information/Long\\_Term\\_Condition\\_Quality\\_Report.pdf](https://www.scotlandscensus.gov.uk/documents/supporting_information/Long_Term_Condition_Quality_Report.pdf)
  27. Idring S, Lundberg M, Sturn H, et al. Changes in prevalence of autism spectrum disorders in 2001–2011: Findings from the Stockholm Youth Cohort. *J Autism Dev Disord* 2015;45:1766–1773.
  28. Data Resource Center for Child & Adolescent Health. *National Health Interview Survey (NHIS) – Child; 2014*. Available at: <http://childhealthdata.org/browse/survey>
  29. Centres for Disease Control and Prevention. Prevalence of Autism Spectrum Disorder Among Children Aged 8 Years - Autism and Developmental Disabilities Monitoring Network, 11 Sites, United States, 2014. *Surveill Summ* 2018;67(6):1-23.
  30. National Institute for Health and Clinical Excellence. Autism diagnosis in children and young people. Evidence update April 2013. A summary of selected new evidence relevant to NICE clinical guideline 128 'Autism - recognition, referral and diagnosis of children and young people on the autism spectrum' (2011). Evidence update 40. *National Institute for Health and Clinical Excellence* 2013.

**Table 1. Examples of findings from systematic reviews of recent studies on childhood/youth prevalence of autism**

| <b>Review</b>                           | <b>N of studies</b>                | <b>Publication dates of studies</b> | <b>Median prevalence /1,000</b> | <b>Range /1,000</b> |          |
|-----------------------------------------|------------------------------------|-------------------------------------|---------------------------------|---------------------|----------|
| <b>Autistic disorder</b>                |                                    |                                     |                                 |                     |          |
| French et al., 2013                     | Autistic disorder                  | 26                                  | 2000-2011                       | 2.2                 | 0.8-9.4  |
|                                         | Asperger syndrome*                 | 13                                  | 1998-2011                       | 2.1                 | 0.5-2.8  |
| Elsabbagh et al., 2012                  | Northern European                  | 16                                  | 2000-2008                       | 1.9                 | 0.7-3.9  |
|                                         | Western Pacific                    | 12                                  | 2000-2011                       | 1.2                 | 0.3-9.4  |
|                                         | South East Asia/East Mediterranean | 0                                   | -                               | -                   | -        |
|                                         | Americas                           | 7                                   | 2001-2010                       | 2.2                 | 1.1-4.1  |
|                                         | <i>Overall</i>                     |                                     |                                 | 1.7                 | 0.3-9.4  |
| Tsai, 2014                              | 43                                 | 2001-2013                           | 2.8                             | 0.3-19.0            |          |
| <b>Pervasive developmental disorder</b> |                                    |                                     |                                 |                     |          |
| French et al., 2013                     | 34                                 | 2000-2011                           | 6.2                             | 0.6-26.4            |          |
| Elsabbagh et al., 2012                  | Northern Europe                    | 14                                  | 2000-2011                       | 6.2                 | 3.0-11.6 |
|                                         | Western Pacific                    | 4                                   | 2004-2011                       | -                   | 1.6-19.0 |
|                                         | South East Asia/East Mediterranean | 4                                   | 2007-2012                       | -                   | 0.1-10.7 |
|                                         | Americas                           | 13                                  | 2001-2010                       | 6.6                 | 1.3-11.0 |
|                                         | <i>Overall</i>                     |                                     |                                 | 6.2                 | 0.1-19.0 |
| Tsai, 2014                              | 59                                 | 2000-2014                           | 7.0                             | 0.2-26.4            |          |
| Adak & Halder, 2017                     | 25                                 | 2005-2015                           | 9.2                             | 0.7-26.4            |          |

\*The authors comment on dubious quality of results

Table 2. Identified prevalence of childhood autism by age and gender

| Age in years | All children |         |         | Children with autism |              |               |
|--------------|--------------|---------|---------|----------------------|--------------|---------------|
|              | Total        | Female  | Male    | Total                | Female       | Male          |
| 0            | 58,715       | 28,823  | 29,892  | 76 (0.1%)            | 34 (0.1%)    | 42 (0.1%)     |
| 1            | 59,556       | 29,188  | 30,368  | 126 (0.2%)           | 52 (0.2%)    | 74 (0.2%)     |
| 2            | 58,909       | 28,936  | 29,973  | 301 (0.5%)           | 87 (0.3%)    | 214 (0.7%)    |
| 3            | 58,764       | 28,735  | 30,029  | 509 (0.9%)           | 132 (0.5%)   | 377 (1.3%)    |
| 4            | 56,877       | 27,915  | 28,962  | 730 (1.3%)           | 176 (0.6%)   | 554 (1.9%)    |
| 5            | 55,224       | 26,910  | 28,314  | 966 (1.7%)           | 223 (0.8%)   | 743 (2.6%)    |
| 6            | 55,236       | 26,872  | 28,364  | 1,053 (1.9%)         | 200 (0.7%)   | 853 (3.0%)    |
| 7            | 53,786       | 26,172  | 27,614  | 1,154 (2.1%)         | 244 (0.9%)   | 910 (3.3%)    |
| 8            | 52,325       | 25,665  | 26,660  | 1,243 (2.4%)         | 222 (0.9%)   | 1,021 (3.8%)  |
| 9            | 53,046       | 26,022  | 27,024  | 1,418 (2.7%)         | 257 (1.0%)   | 1,161 (4.3%)  |
| 10           | 55,067       | 26,950  | 28,117  | 1,549 (2.8%)         | 306 (1.1%)   | 1,243 (4.4%)  |
| 11           | 56,769       | 27,699  | 29,070  | 1,623 (2.9%)         | 313 (1.1%)   | 1,310 (4.5%)  |
| 12           | 58,656       | 28,412  | 30,244  | 1,665 (2.8%)         | 324 (1.1%)   | 1,341 (4.4%)  |
| 13           | 59,971       | 29,353  | 30,618  | 1,705 (2.8%)         | 330 (1.1%)   | 1,375 (4.5%)  |
| 14           | 61,152       | 29,586  | 31,566  | 1,658 (2.7%)         | 307 (1.0%)   | 1,351 (4.3%)  |
| 15           | 62,278       | 29,987  | 32,291  | 1,572 (2.5%)         | 300 (1.0%)   | 1,272 (3.9%)  |
| 0-15         | 916,331      | 447,225 | 469,106 | 17,348 (1.9%)        | 3,507 (0.8%) | 13,841 (3.0%) |

**Table 3. General health status of children and young people with and without autism**

| General health   | Age in years              |                      |                       |                            |                        |                        |                          |                      |                      |                            |                        |                        |
|------------------|---------------------------|----------------------|-----------------------|----------------------------|------------------------|------------------------|--------------------------|----------------------|----------------------|----------------------------|------------------------|------------------------|
|                  | 0-15 years<br>N=916,331   |                      |                       |                            |                        |                        | 16-24 years<br>N=632,488 |                      |                      |                            |                        |                        |
|                  | Autism                    |                      |                       | Without autism             |                        |                        | Autism                   |                      |                      | Without autism             |                        |                        |
|                  | Total<br>17,348<br>(100%) | F<br>3,507<br>(100%) | M<br>13,841<br>(100%) | Total<br>898,983<br>(100%) | F<br>443,718<br>(100%) | M<br>455,265<br>(100%) | Total<br>7,715<br>(100%) | F<br>1,676<br>(100%) | M<br>6,039<br>(100%) | Total<br>624,773<br>(100%) | F<br>313,929<br>(100%) | M<br>310,844<br>(100%) |
| <b>Very good</b> | 7,470<br>(43.1%)          | 1,291<br>(36.8%)     | 6,179<br>(44.6%)      | 758,328<br>(84.4%)         | 376,945<br>(85.0%)     | 381,383<br>(83.8%)     | 3,070<br>(39.8%)         | 531<br>(31.7%)       | 2,539<br>(42.0%)     | 459,492<br>(73.5%)         | 223,178<br>(71.1%)     | 236,314<br>(76.0%)     |
| <b>Good</b>      | 6,073<br>(35.0%)          | 1,178<br>(33.6%)     | 4,895<br>(35.4%)      | 122,814<br>(13.7%)         | 58,499<br>(13.2%)      | 64,315<br>(14.1%)      | 2,683<br>(34.8%)         | 605<br>(36.1%)       | 2,078<br>(34.4%)     | 137,956<br>(22.1%)         | 75,489<br>(24.0%)      | 62,467<br>(20.1%)      |
| <b>Fair</b>      | 2,892<br>(16.7%)          | 718<br>(20.5%)       | 2,174<br>(15.7%)      | 14,760<br>(1.6%)           | 6,800<br>(1.5%)        | 7,960<br>(1.7%)        | 1,451<br>(18.8%)         | 367<br>(21.9%)       | 1,084<br>(17.9%)     | 22,102<br>(3.5%)           | 12,507<br>(4.0%)       | 9,595<br>(3.1%)        |
| <b>Bad</b>       | 651<br>(3.8%)             | 204<br>(5.8%)        | 447<br>(3.2%)         | 2,367<br>(0.3%)            | 1,159<br>(0.3%)        | 1,208<br>(0.3%)        | 375<br>(4.9%)            | 125<br>(7.5%)        | 250<br>(4.1%)        | 4,237<br>(0.7%)            | 2,279<br>(0.7%)        | 1,958<br>(0.6%)        |
| <b>Very bad</b>  | 262<br>(1.5%)             | 116<br>(3.3%)        | 146<br>(1.1%)         | 714<br>(0.1%)              | 315<br>(0.1%)          | 399<br>(0.1%)          | 136<br>(1.8%)            | 48<br>(2.9%)         | 88<br>(1.5%)         | 986<br>(0.2%)              | 476<br>(0.2%)          | 510<br>(0.2%)          |

**Table 4. Odds ratio of autism, age, and gender in predicting poor health\* in the whole population**

| Variable |                       | Odds ratio | 95% confidence interval |
|----------|-----------------------|------------|-------------------------|
| Autism   | No autism (reference) | -          |                         |
|          | Autism                | 11.339     | 10.983-11.707           |
| Age      | 0-15 (reference)      | -          |                         |
|          | 16-24                 | 2.137      | 2.098-2.176             |
| Gender   | Male (reference)      | -          |                         |
|          | Female                | 1.126      | 1.106-1.147             |
| Constant |                       | .020       |                         |

\*fair, bad or very bad health

**Table 5. Odds ratios of age and gender in predicting poor health\* in the population with autism**

| Variable |                  | Odds ratio | 95% confidence interval |
|----------|------------------|------------|-------------------------|
| Age      | 0-15 (reference) | -          |                         |
|          | 16-24            | 1.206      | 1.133-1.284             |
| Gender   | Male (reference) | -          |                         |
|          | Female           | 1.635      | 1.527-1.750             |
| Constant |                  | .252       |                         |

\*fair, bad or very bad health



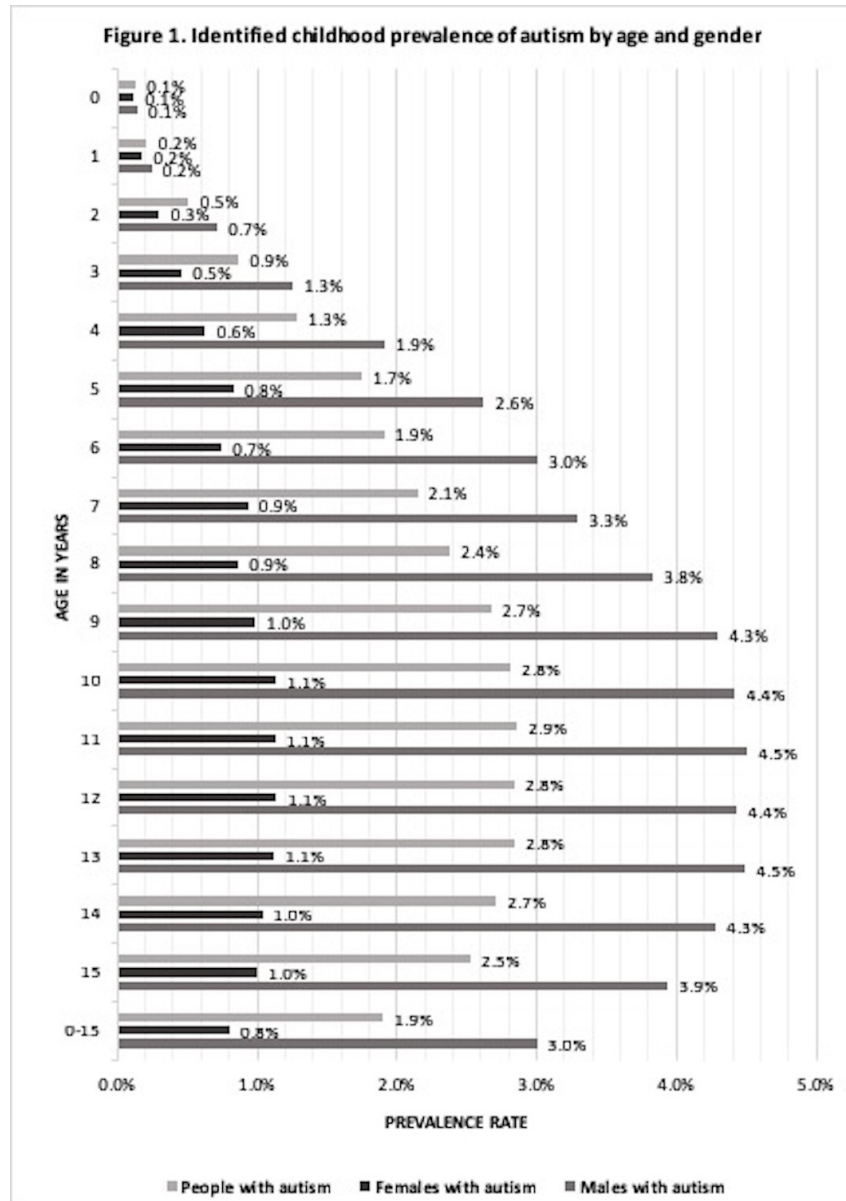

90x127mm (300 x 300 DPI)

**STROBE 2007 (v4) Statement—Checklist of items that should be included in reports of *cross-sectional studies***

| Section/Topic                | Item # | Recommendation                                                                                                                                                                       | Reported on page #                                                               |
|------------------------------|--------|--------------------------------------------------------------------------------------------------------------------------------------------------------------------------------------|----------------------------------------------------------------------------------|
| Title and abstract           | 1      | (a) Indicate the study's design with a commonly used term in the title or the abstract                                                                                               | Page 1                                                                           |
|                              |        | (b) Provide in the abstract an informative and balanced summary of what was done and what was found                                                                                  | Page 2                                                                           |
| <b>Introduction</b>          |        |                                                                                                                                                                                      |                                                                                  |
| Background/rationale         | 2      | Explain the scientific background and rationale for the investigation being reported                                                                                                 | Page 4-5<br>Section: Introduction                                                |
| Objectives                   | 3      | State specific objectives, including any prespecified hypotheses                                                                                                                     | Page 5<br>Section: Introduction                                                  |
| <b>Methods</b>               |        |                                                                                                                                                                                      |                                                                                  |
| Study design                 | 4      | Present key elements of study design early in the paper                                                                                                                              | Page 5-8<br>Sections:<br>Methods/Procedures,<br>Data source, Census<br>variables |
| Setting                      | 5      | Describe the setting, locations, and relevant dates, including periods of recruitment, exposure, follow-up, and data collection                                                      | Page 5-6<br>Sections:<br>Methods/Procedures,<br>Data source                      |
| Participants                 | 6      | (a) Give the eligibility criteria, and the sources and methods of selection of participants                                                                                          | Page 6-8<br>Sections: Methods/Data<br>source, Census variables                   |
| Variables                    | 7      | Clearly define all outcomes, exposures, predictors, potential confounders, and effect modifiers. Give diagnostic criteria, if applicable                                             | Page 6-8<br>Section: Methods/Census<br>variables                                 |
| Data sources/<br>measurement | 8*     | For each variable of interest, give sources of data and details of methods of assessment (measurement). Describe comparability of assessment methods if there is more than one group | Page 6-8<br>Section: Methods/Census<br>variables                                 |
| Bias                         | 9      | Describe any efforts to address potential sources of bias                                                                                                                            | Page 5-8                                                                         |

|                        |     |                                                                                                                                                                                                   |                                                                                                                                 |
|------------------------|-----|---------------------------------------------------------------------------------------------------------------------------------------------------------------------------------------------------|---------------------------------------------------------------------------------------------------------------------------------|
|                        |     |                                                                                                                                                                                                   | Section: Methods                                                                                                                |
| Study size             | 10  | Explain how the study size was arrived at                                                                                                                                                         | Page 5-9<br>Sections: Methods/Data source, Census variables                                                                     |
| Quantitative variables | 11  | Explain how quantitative variables were handled in the analyses. If applicable, describe which groupings were chosen and why                                                                      | Page 8<br>Section: Methods/Data analysis                                                                                        |
| Statistical methods    | 12  | (a) Describe all statistical methods, including those used to control for confounding                                                                                                             | Page 8<br>Section: Methods/Data analysis                                                                                        |
|                        |     | (b) Describe any methods used to examine subgroups and interactions                                                                                                                               | Page 8<br>Section: Methods/Data analysis                                                                                        |
|                        |     | (c) Explain how missing data were addressed                                                                                                                                                       | Page 6-8<br>Sections: Methods/Data source, Census variables                                                                     |
|                        |     | (d) If applicable, describe analytical methods taking account of sampling strategy                                                                                                                | N/A                                                                                                                             |
|                        |     | (e) Describe any sensitivity analyses                                                                                                                                                             | N/A                                                                                                                             |
| <b>Results</b>         |     |                                                                                                                                                                                                   |                                                                                                                                 |
| Participants           | 13* | (a) Report numbers of individuals at each stage of study—eg numbers potentially eligible, examined for eligibility, confirmed eligible, included in the study, completing follow-up, and analysed | Page 9<br>Section: Results/Number (%) of children and young people with autism by age and gender<br>Page 18 Table 2<br>Figure 1 |
|                        |     | (b) Give reasons for non-participation at each stage                                                                                                                                              | N/A                                                                                                                             |
|                        |     | (c) Consider use of a flow diagram                                                                                                                                                                | N/A                                                                                                                             |
| Descriptive data       | 14* | (a) Give characteristics of study participants (eg demographic, clinical, social) and information on exposures and potential confounders                                                          | Page 9<br>Section: Results/Number (%) of children and young                                                                     |

|                   |     |                                                                                                                                                                                                                |                                                                                                                       |
|-------------------|-----|----------------------------------------------------------------------------------------------------------------------------------------------------------------------------------------------------------------|-----------------------------------------------------------------------------------------------------------------------|
|                   |     |                                                                                                                                                                                                                | people with autism by age and gender<br>Page 18 Table 2<br>Figure 1                                                   |
|                   |     | (b) Indicate number of participants with missing data for each variable of interest                                                                                                                            | Page 6-8<br>Sections: Methods/<br>Census variables                                                                    |
| Outcome data      | 15* | Report numbers of outcome events or summary measures                                                                                                                                                           | N/A                                                                                                                   |
| Main results      | 16  | (a) Give unadjusted estimates and, if applicable, confounder-adjusted estimates and their precision (e.g., 95% confidence interval). Make clear which confounders were adjusted for and why they were included | Page 9-10<br>Section: Results/General health<br>Page 18 Table 3<br>Page 19 Tables 4 and 5                             |
|                   |     | (b) Report category boundaries when continuous variables were categorized                                                                                                                                      | Page 8<br>Section: Methods/Data analysis<br>Page 18 Table 2<br>Pages 19 Table 3<br>Page 20 Tables 4 and 5<br>Figure 1 |
|                   |     | (c) If relevant, consider translating estimates of relative risk into absolute risk for a meaningful time period                                                                                               | N/A                                                                                                                   |
| Other analyses    | 17  | Report other analyses done—eg analyses of subgroups and interactions, and sensitivity analyses                                                                                                                 | N/A                                                                                                                   |
| <b>Discussion</b> |     |                                                                                                                                                                                                                |                                                                                                                       |
| Key results       | 18  | Summarise key results with reference to study objectives                                                                                                                                                       | Page 10-12<br>Section: Discussion/<br>Principal findings and interpretation,<br>Comparison with existing literature   |
| Limitations       | 19  | Discuss limitations of the study, taking into account sources of potential bias or imprecision. Discuss both direction and magnitude of any potential bias                                                     | Page 12-13<br>Section: Strengths and                                                                                  |

1  
2  
3  
4  
5  
6  
7  
8  
9  
10  
11  
12  
13  
14  
15  
16  
17  
18  
19  
20  
21  
22  
23  
24  
25  
26  
27  
28  
29  
30  
31  
32  
33  
34  
35  
36  
37  
38  
39  
40  
41  
42  
43  
44  
45  
46

|                          |    |                                                                                                                                                                            |                                                                                                                     |
|--------------------------|----|----------------------------------------------------------------------------------------------------------------------------------------------------------------------------|---------------------------------------------------------------------------------------------------------------------|
|                          |    |                                                                                                                                                                            | limitations                                                                                                         |
| Interpretation           | 20 | Give a cautious overall interpretation of results considering objectives, limitations, multiplicity of analyses, results from similar studies, and other relevant evidence | Page 10-12<br>Section: Discussion/<br>Principal findings and interpretation,<br>Comparison with existing literature |
| Generalisability         | 21 | Discuss the generalisability (external validity) of the study results                                                                                                      | Page 13<br>Section: Implications for clinicians                                                                     |
| <b>Other information</b> |    |                                                                                                                                                                            |                                                                                                                     |
| Funding                  | 22 | Give the source of funding and the role of the funders for the present study and, if applicable, for the original study on which the present article is based              | Page 14<br>Section: Funding                                                                                         |

\*Give information separately for exposed and unexposed groups.

**Note:** An Explanation and Elaboration article discusses each checklist item and gives methodological background and published examples of transparent reporting. The STROBE checklist is best used in conjunction with this article (freely available on the Web sites of PLoS Medicine at <http://www.plosmedicine.org/>, Annals of Internal Medicine at <http://www.annals.org/>, and Epidemiology at <http://www.epidem.com/>). Information on the STROBE Initiative is available at [www.strobe-statement.org](http://www.strobe-statement.org).
